# Supplementary material for: A Facile Synthesis for Novel Loperamide Analogs as Potential μ Opioid Receptor Agonists
Source: Molecules. 2012 Dec 3;17(12):14288–97. doi: 10.3390/molecules171214288 (PMC6268526; doi:10.3390/molecules171214288)

## Supporting Information

### Table of Contents

#### **<sup>1</sup>H-NMR, <sup>13</sup>C-NMR and MS Spectrum of all compounds.**

|                                                                                  |            |
|----------------------------------------------------------------------------------|------------|
| <b>Figure S1.</b> 500 MHz <sup>1</sup> H-NMR spectrum of Compound <b>10b</b> .   | <b>S3</b>  |
| <b>Figure S2.</b> MS spectrum of Compound <b>10b</b> .                           | <b>S4</b>  |
| <b>Figure S3.</b> 500 MHz <sup>1</sup> H-NMR spectrum of Compound <b>12a</b> .   | <b>S5</b>  |
| <b>Figure S4.</b> 125 MHz <sup>13</sup> C-NMR spectrum of Compound <b>12a</b> .  | <b>S6</b>  |
| <b>Figure S5.</b> 470 MHz <sup>19</sup> F-NMR spectrum of Compound <b>12a</b> .  | <b>S7</b>  |
| <b>Figure S6.</b> MS spectrum of Compound <b>12a</b> .                           | <b>S8</b>  |
| <b>Figure S7.</b> 500 MHz <sup>1</sup> H-NMR spectrum of Compound <b>12b</b> .   | <b>S9</b>  |
| <b>Figure S8.</b> 500 MHz <sup>1</sup> H-NMR spectrum of Compound <b>12c</b> .   | <b>S10</b> |
| <b>Figure S9.</b> 125 MHz <sup>13</sup> C-NMR spectrum of Compound <b>12c</b> .  | <b>S11</b> |
| <b>Figure S10.</b> MS spectrum of Compound <b>12c</b> .                          | <b>S12</b> |
| <b>Figure S11.</b> 500 MHz <sup>1</sup> H-NMR spectrum of Compound <b>6</b> .    | <b>S13</b> |
| <b>Figure S12.</b> 125 MHz <sup>13</sup> C-NMR spectrum of Compound <b>6</b> .   | <b>S14</b> |
| <b>Figure S13.</b> <sup>19</sup> F-NMR spectrum of Compound <b>6</b> .           | <b>S15</b> |
| <b>Figure S14.</b> 500 MHz <sup>1</sup> H-NMR spectrum of Compound <b>13b</b> .  | <b>S16</b> |
| <b>Figure S15.</b> 100 MHz <sup>13</sup> C-NMR spectrum of Compound <b>13b</b> . | <b>S17</b> |
| <b>Figure S16.</b> LC-MS spectrum of Compound <b>13b</b> .                       | <b>S18</b> |
| <b>Figure S17.</b> 500 MHz <sup>1</sup> H-NMR spectrum of Compound <b>7</b> .    | <b>S19</b> |

|                                                                                   |            |
|-----------------------------------------------------------------------------------|------------|
| <b>Figure S18.</b> 125 MHz $^{13}\text{C}$ -NMR spectrum of Compound <b>7</b> .   | <b>S20</b> |
| <b>Figure S19.</b> MS spectrum of Compound <b>7</b> .                             | <b>S21</b> |
| <b>Figure S20.</b> 500 MHz $^1\text{H}$ -NMR spectrum of Compound <b>14b</b> .    | <b>S22</b> |
| <b>Figure S21.</b> 125 MHz $^{13}\text{C}$ -NMR spectrum of Compound <b>14b</b> . | <b>S23</b> |
| <b>Figure S22.</b> MS spectrum of Compound <b>14b</b> .                           | <b>S24</b> |
| <b>Figure S23.</b> 500 MHz $^1\text{H}$ -NMR spectrum of Compound <b>18</b> .     | <b>S25</b> |
| <b>Figure S24.</b> 125 MHz $^{13}\text{C}$ -NMR spectrum of Compound <b>18</b> .  | <b>S26</b> |
| <b>Figure S25.</b> MS spectrum of Compound <b>18</b> .                            | <b>S27</b> |
| <b>Figure S26.</b> 500 MHz $^1\text{H}$ -NMR spectra of Compound <b>19</b> .      | <b>S28</b> |
| <b>Figure S27.</b> 125 MHz $^{13}\text{C}$ -NMR spectrum of Compound <b>19</b> .  | <b>S29</b> |
| <b>Figure S28.</b> MS spectrum of Compound <b>19</b> .                            | <b>S30</b> |
| <b>Figure S29.</b> 500 MHz $^1\text{H}$ -NMR spectrum of Compound <b>5</b> .      | <b>S31</b> |
| <b>Figure S30.</b> 125 MHz $^{13}\text{C}$ -NMR spectrum of Compound <b>5</b> .   | <b>S32</b> |
| <b>Figure S31.</b> MS spectrum of Compound <b>5</b> .                             | <b>S33</b> |

## **The Spectrum of Compounds.**

**Figure S1.** 500 MHz  $^1\text{H}$ -NMR spectrum of Compound **10b**.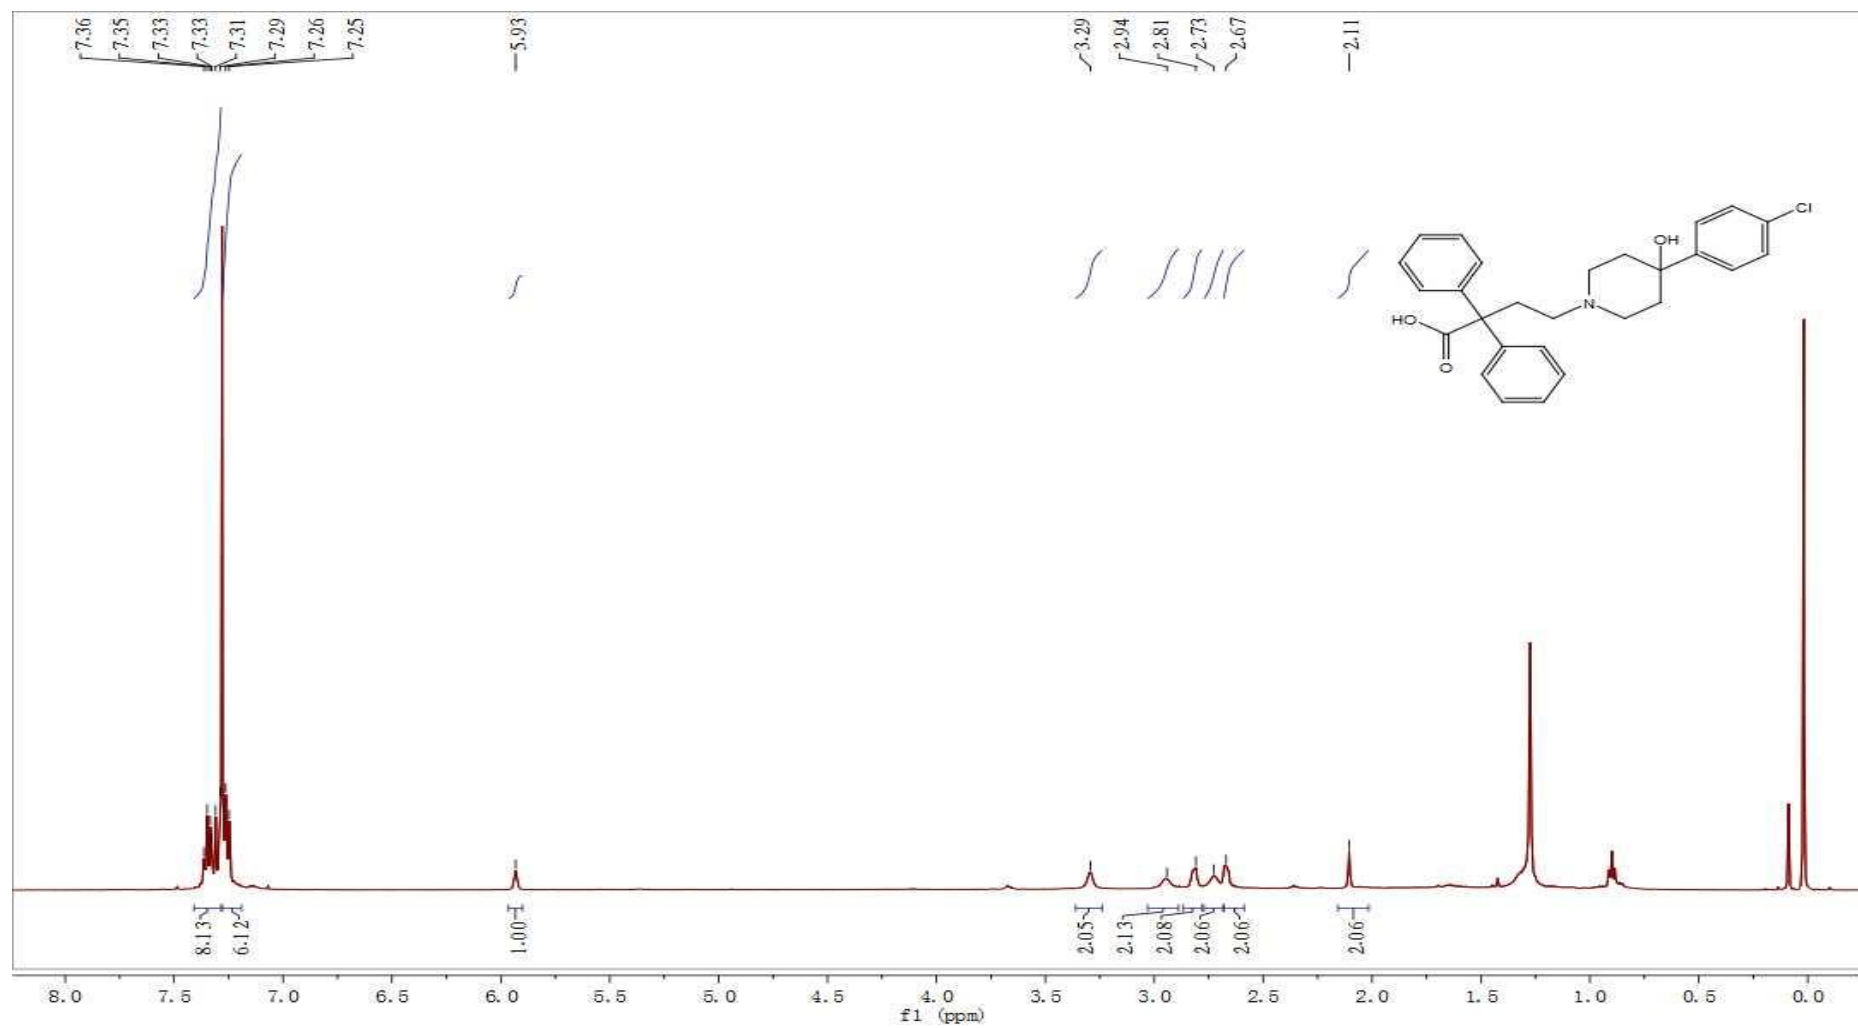

**Figure S2.** MS spectrum of Compound **10b**.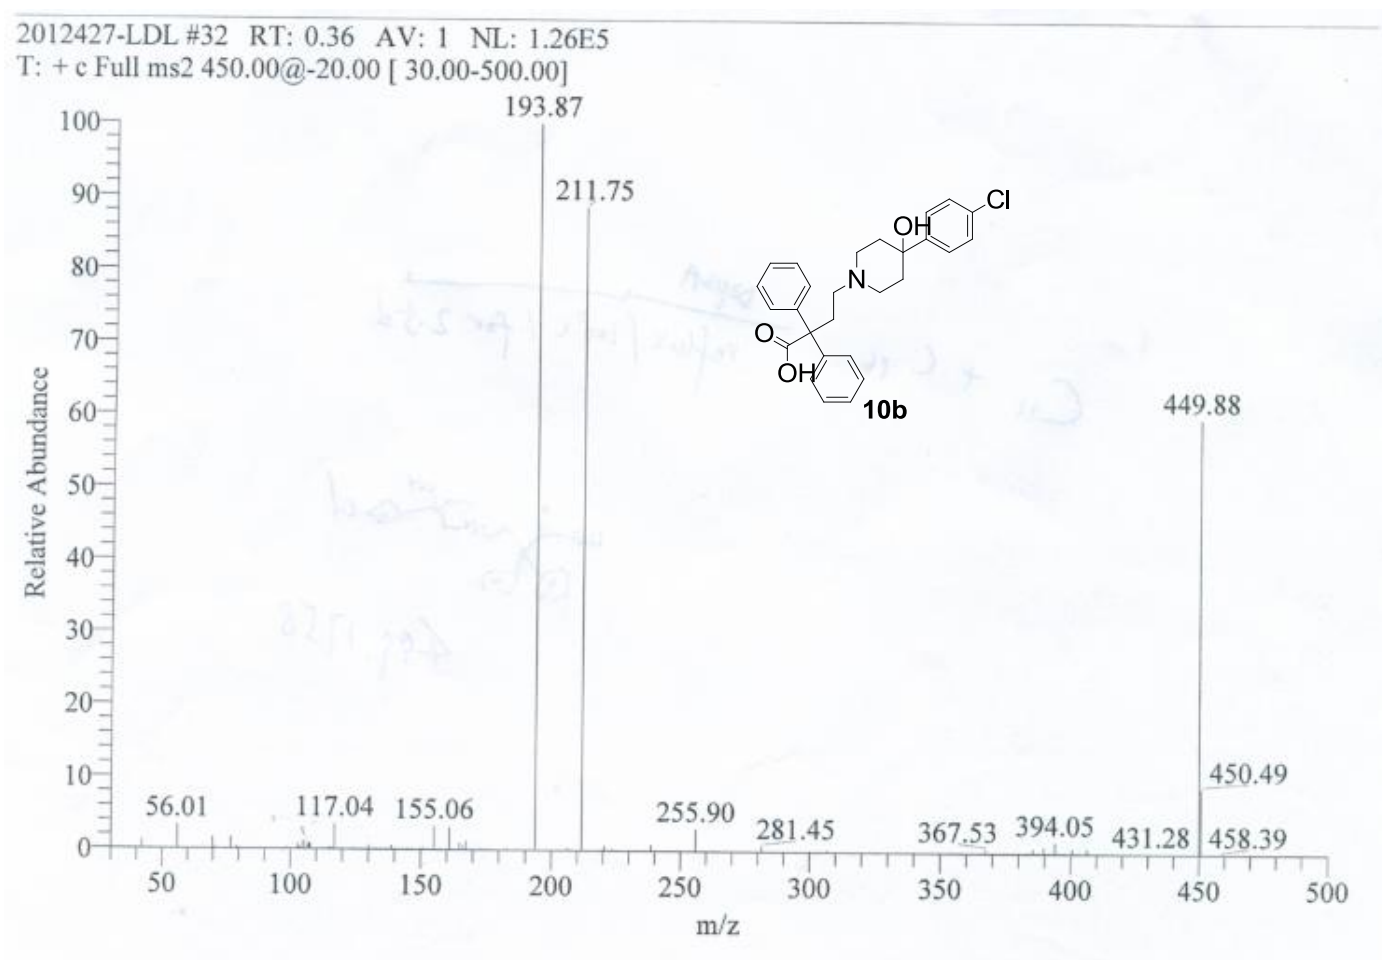

**Figure S3.** 500 MHz  $^1\text{H}$ -NMR spectrum of Compound **12a**.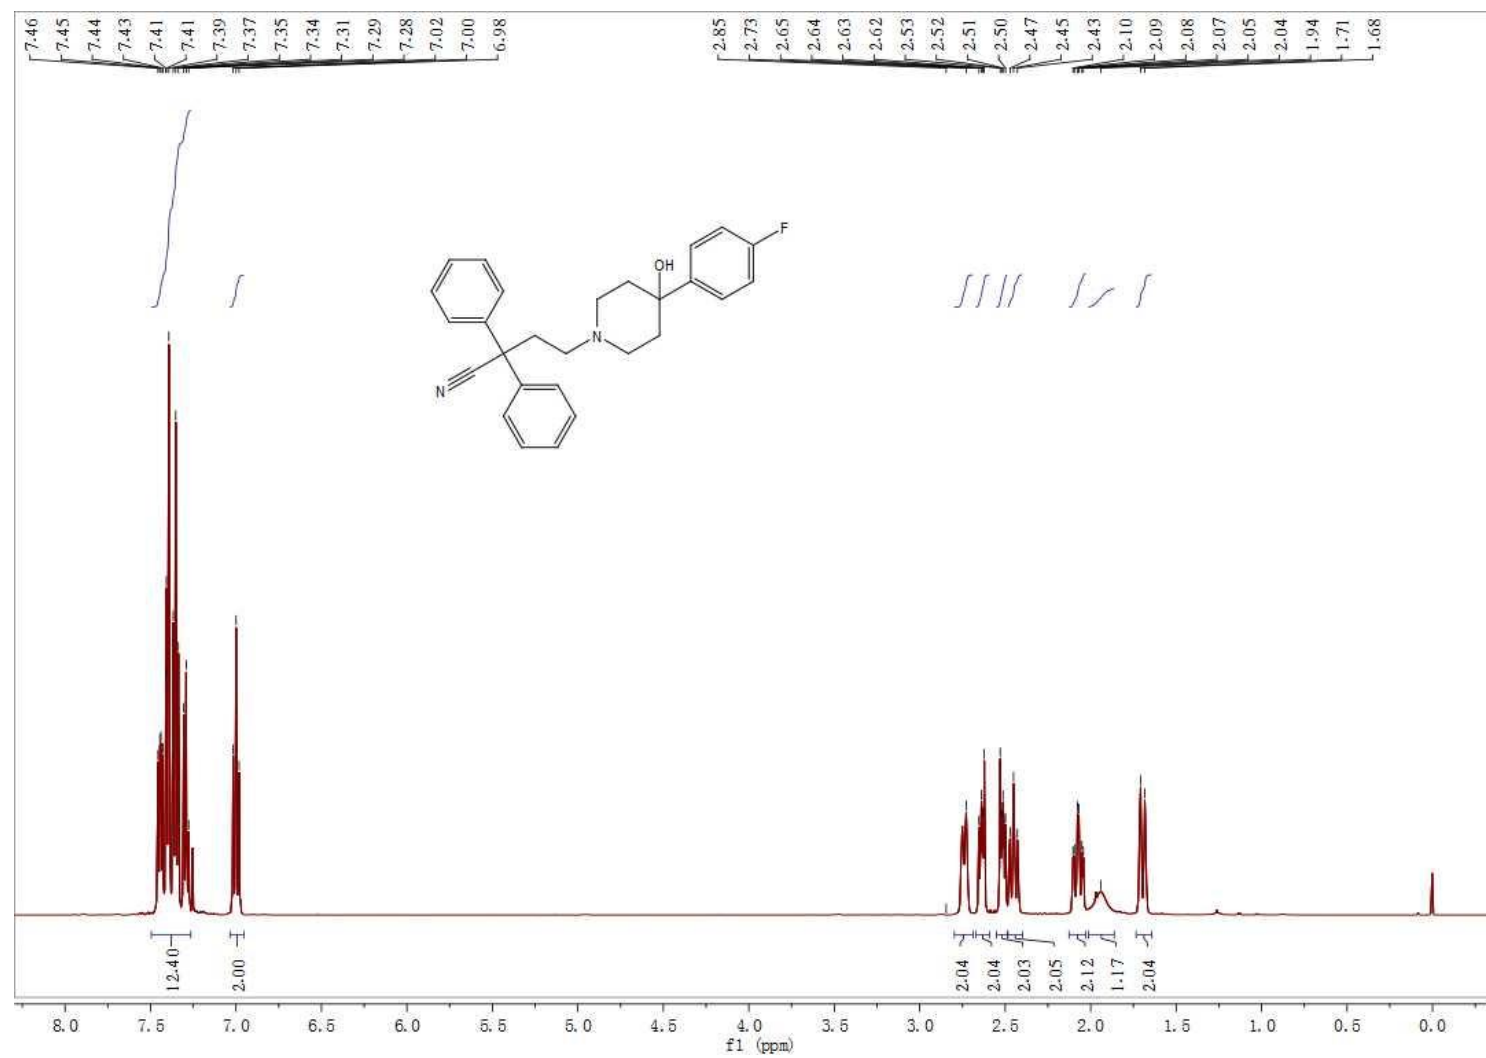

**Figure S4.** 125 MHz  $^{13}\text{C}$ -NMR spectrum of Compound **12a**.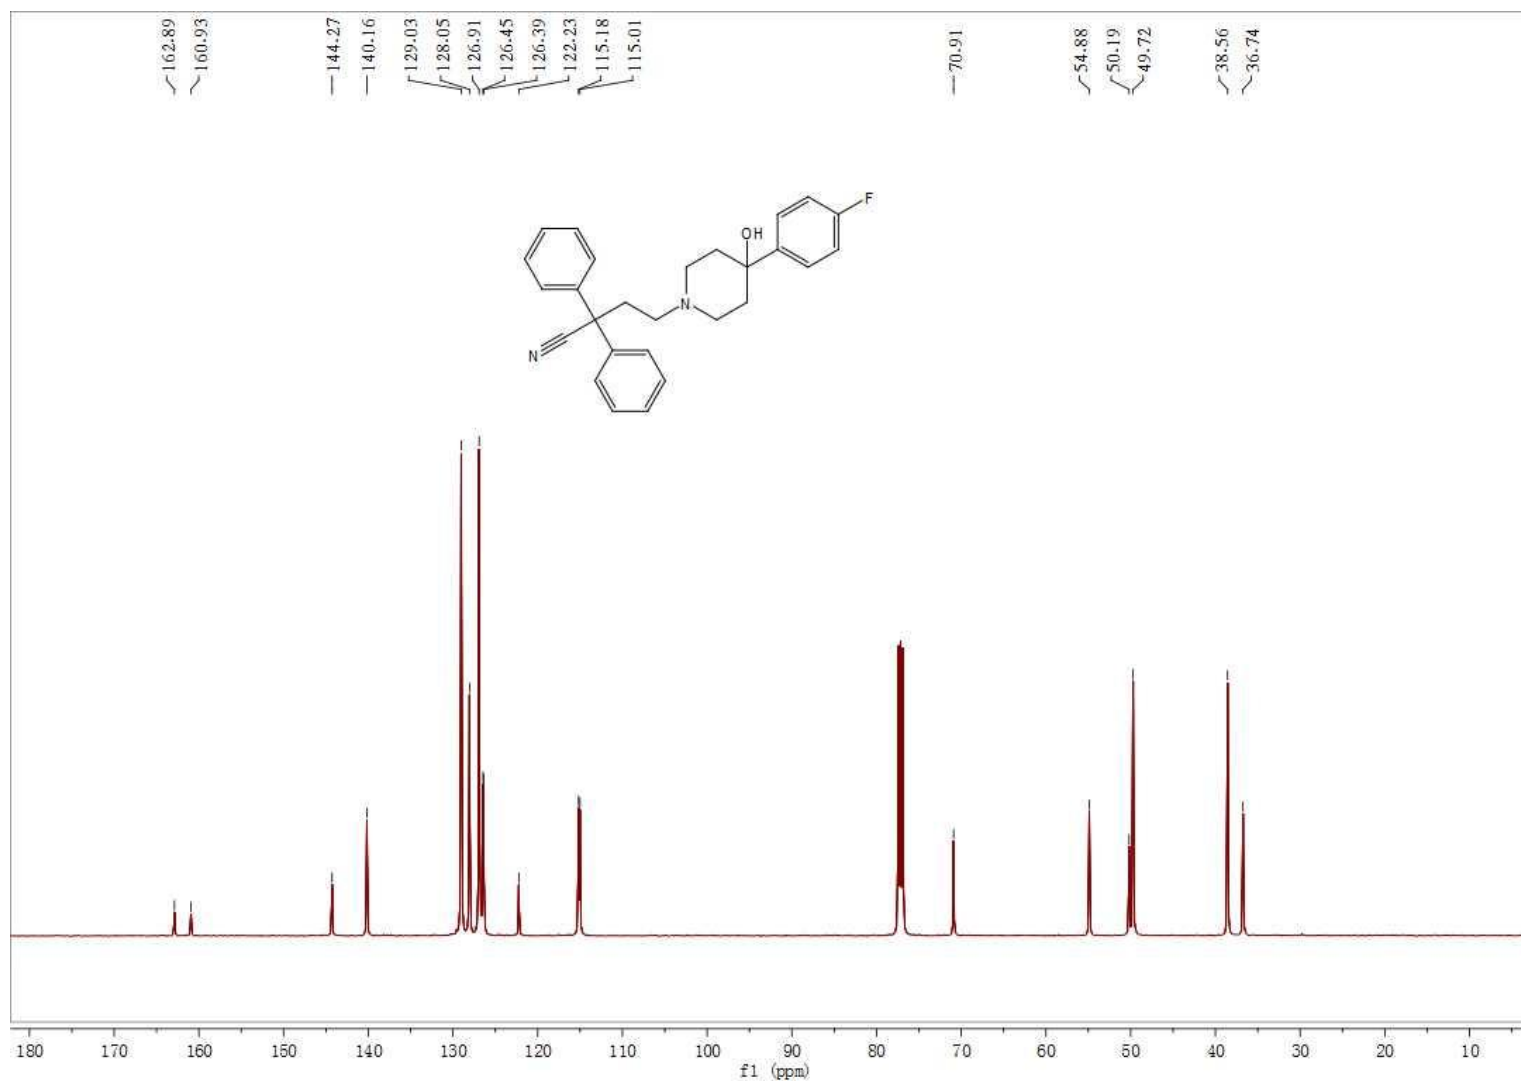

**Figure S5.** 470 MHz  $^{19}\text{F}$ -NMR spectrum of Compound **12a**.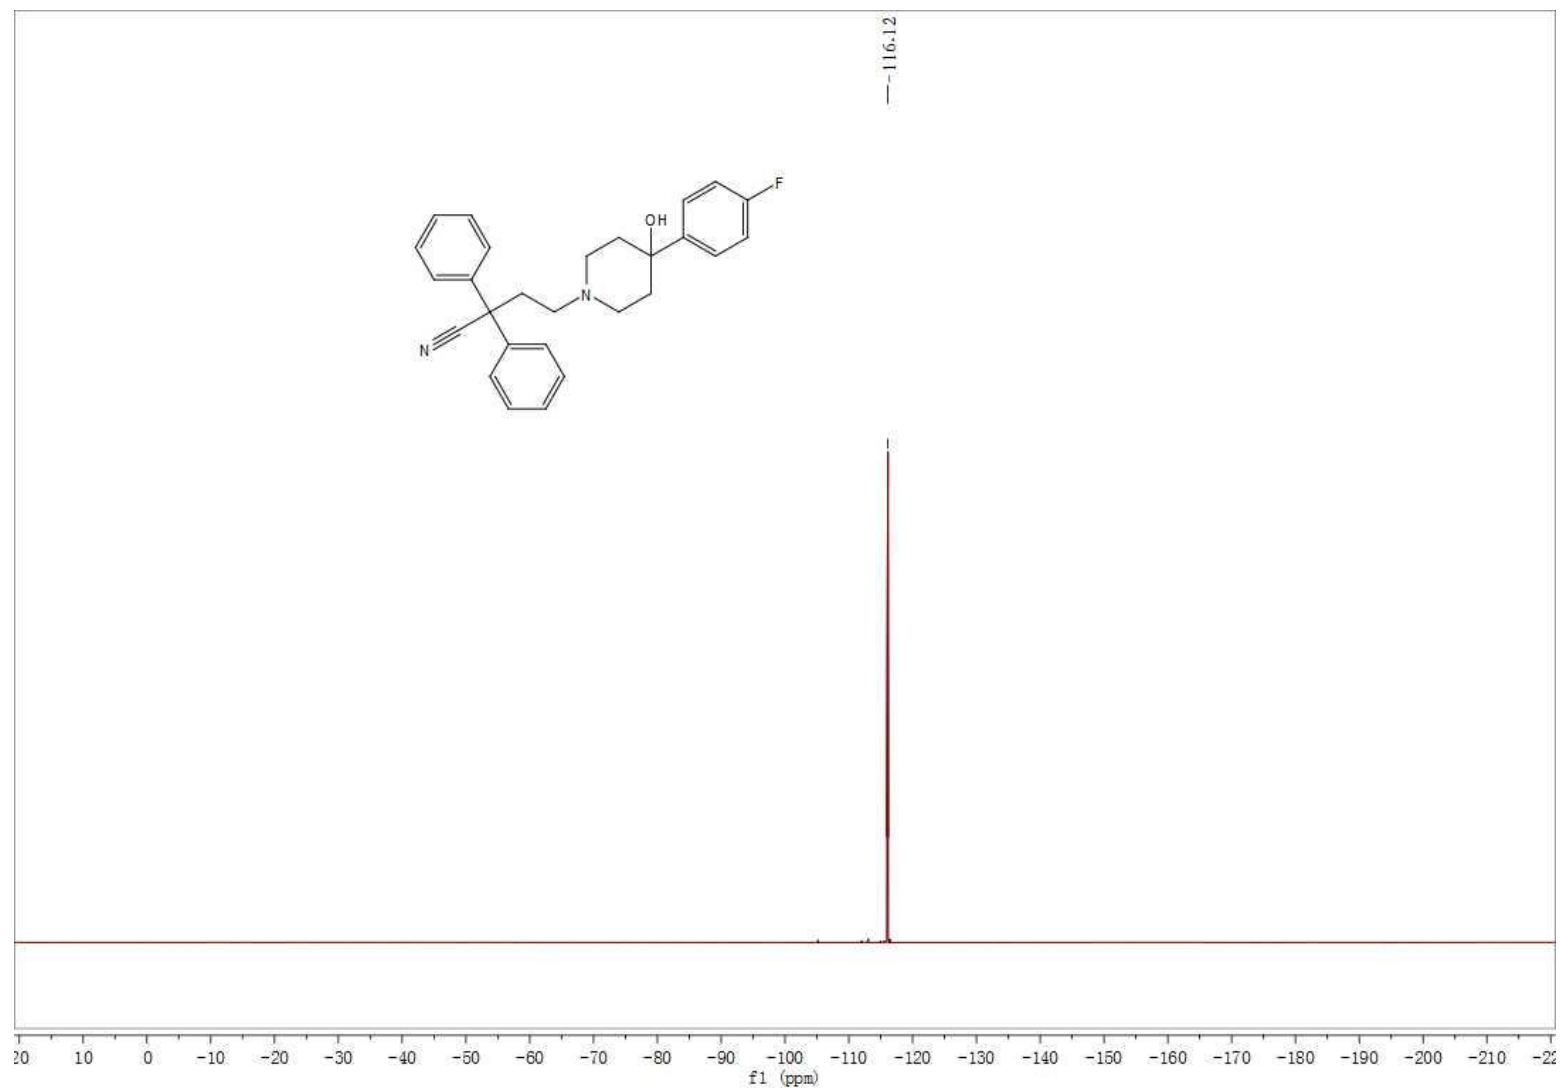

**Figure S6.** MS spectrum of Compound **12a**.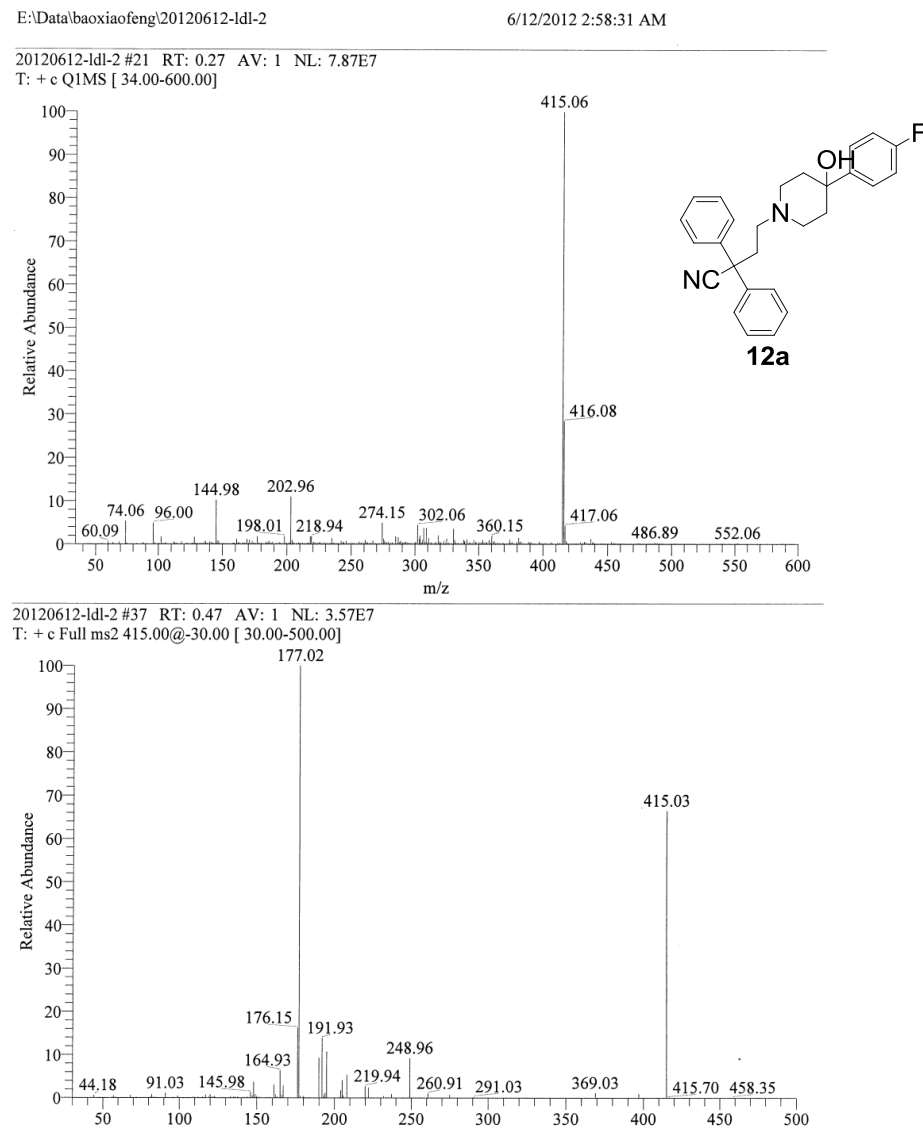

**Figure S7.** 500 MHz  $^1\text{H}$ -NMR spectrum of Compound **12b**.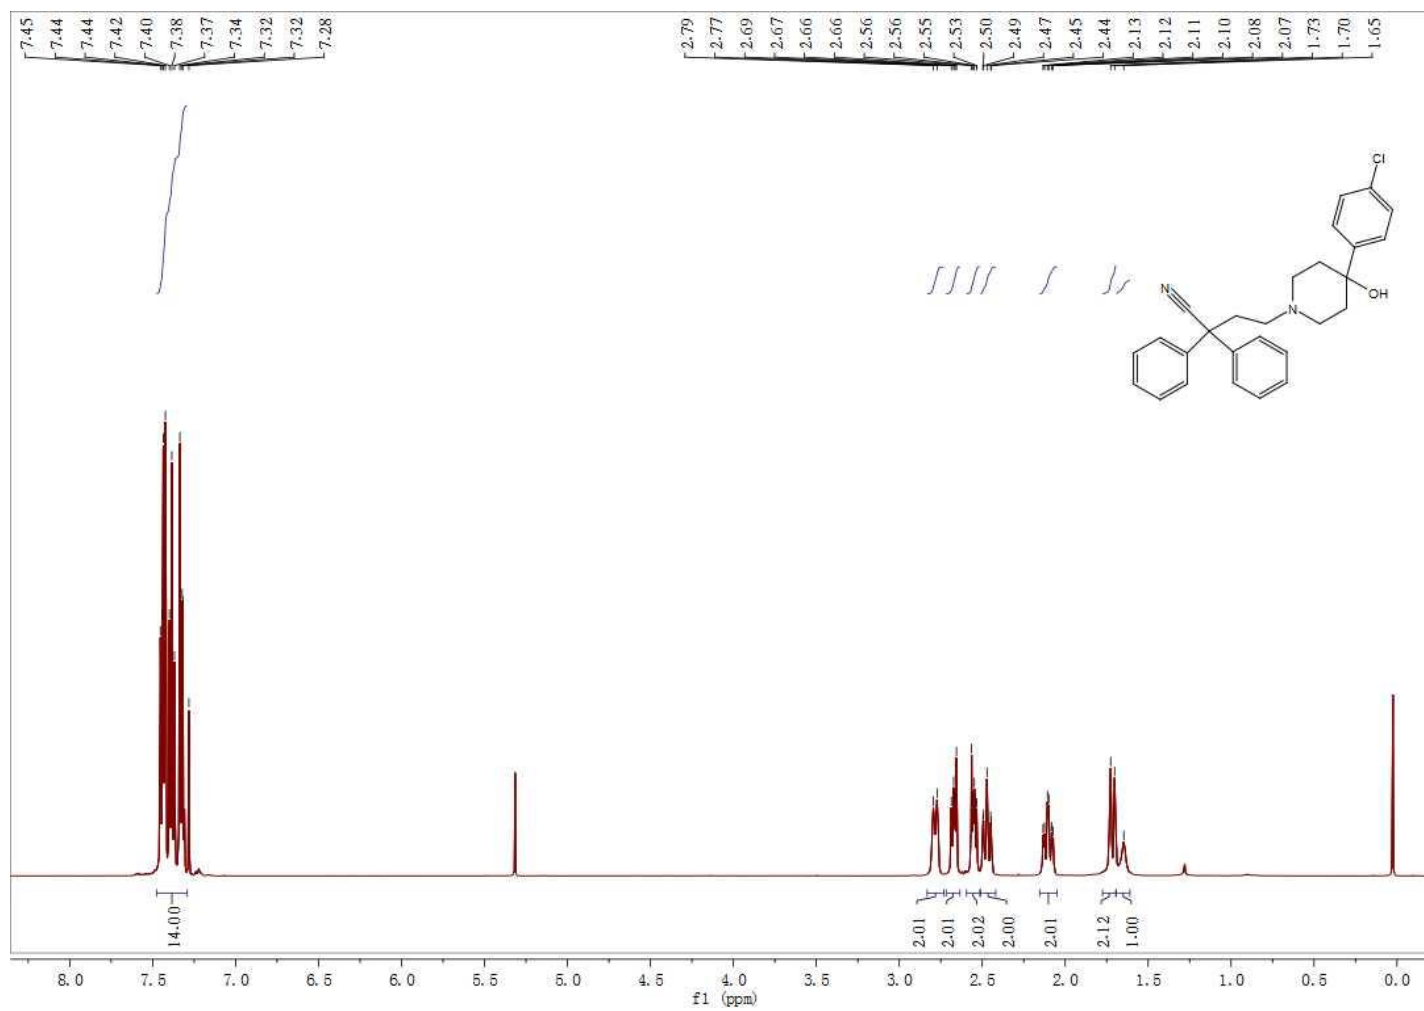

**Figure S8.** 500 MHz  $^1\text{H}$ -NMR spectrum of Compound **12c**.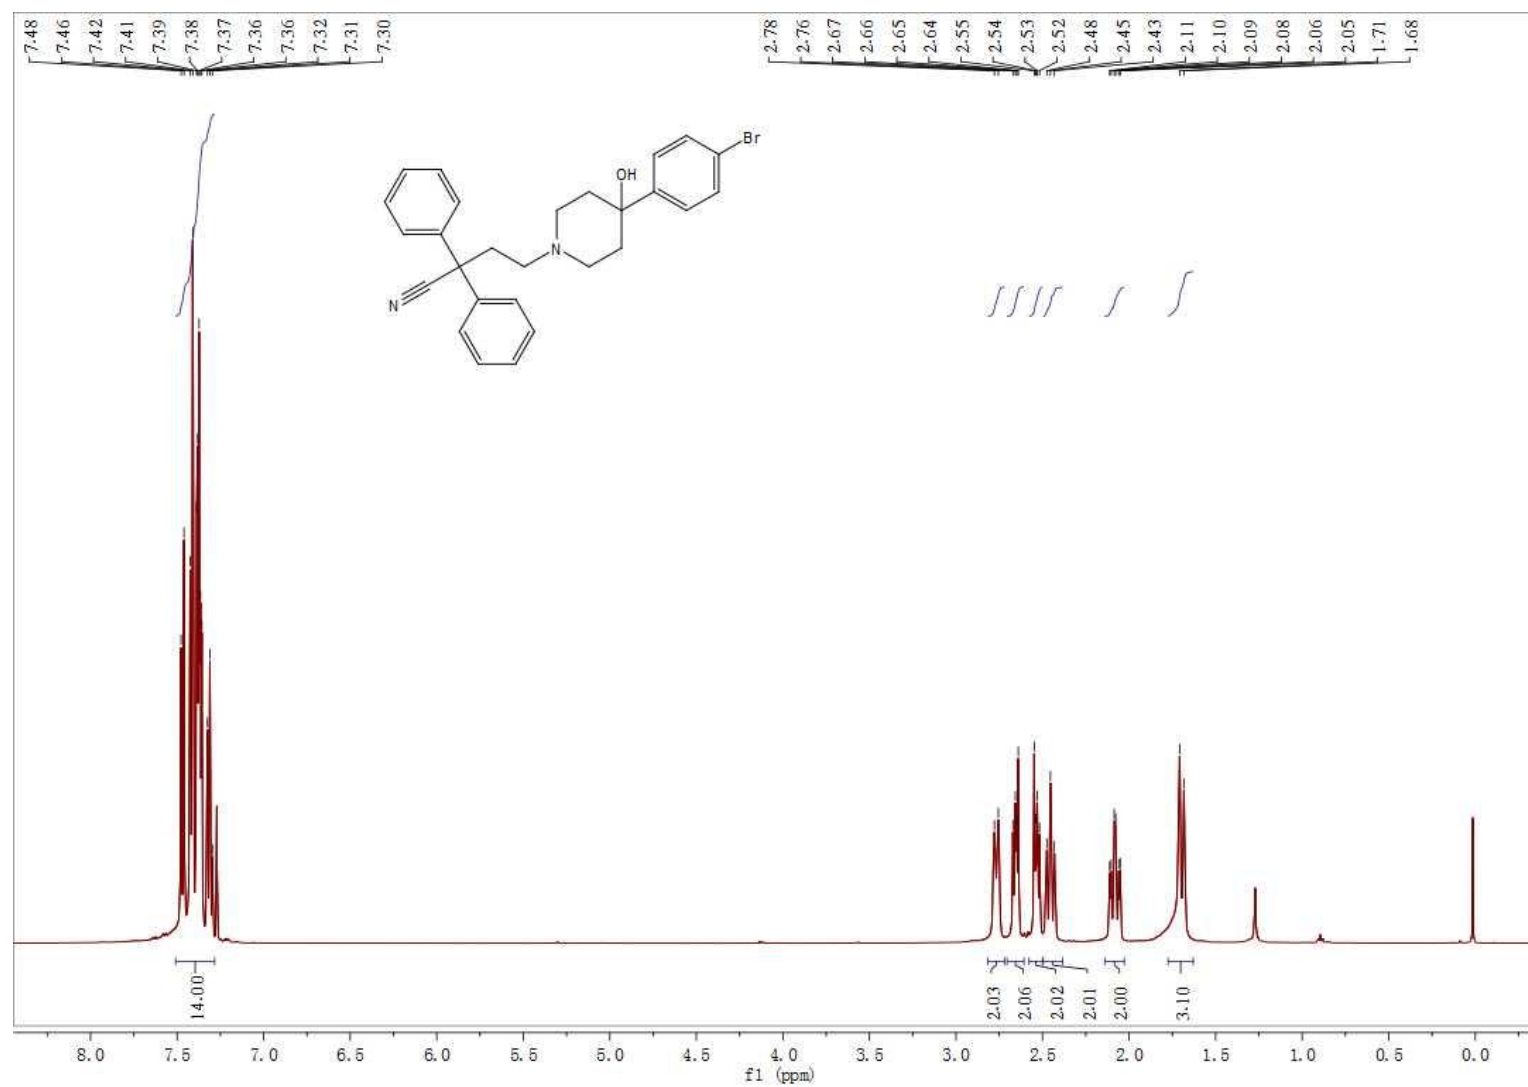

**Figure S9.** 125 MHz  $^{13}\text{C}$ -NMR spectrum of Compound **12c**.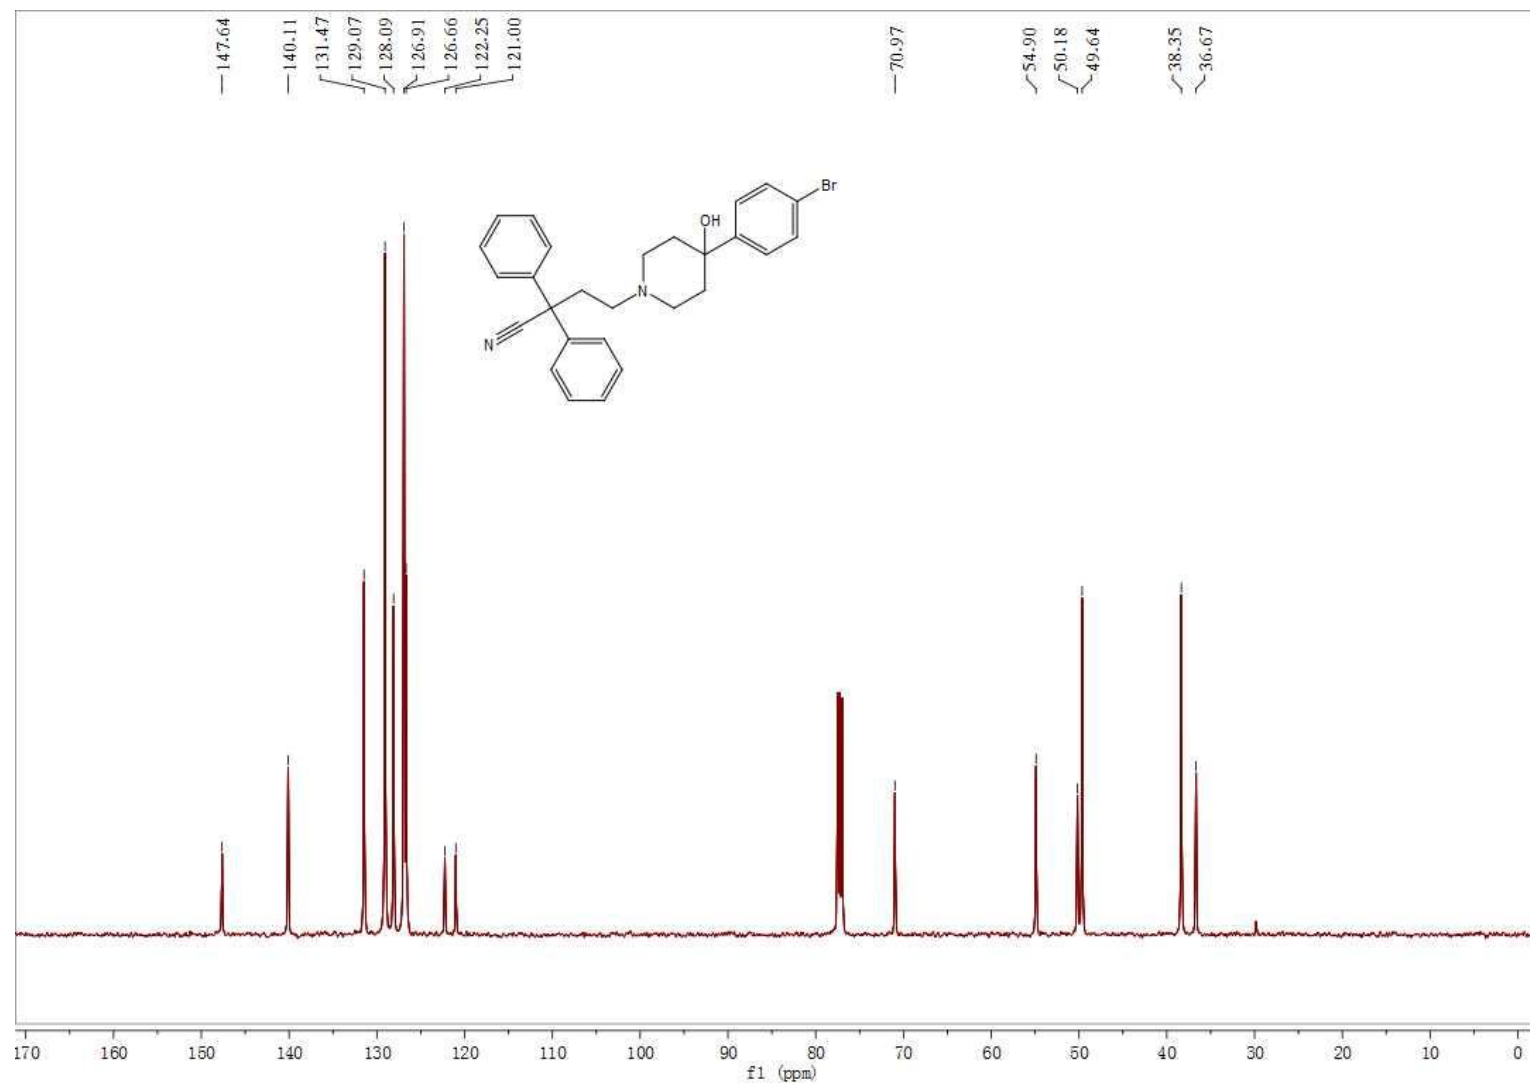

**Figure S10.** MS spectrum of Compound **12c**.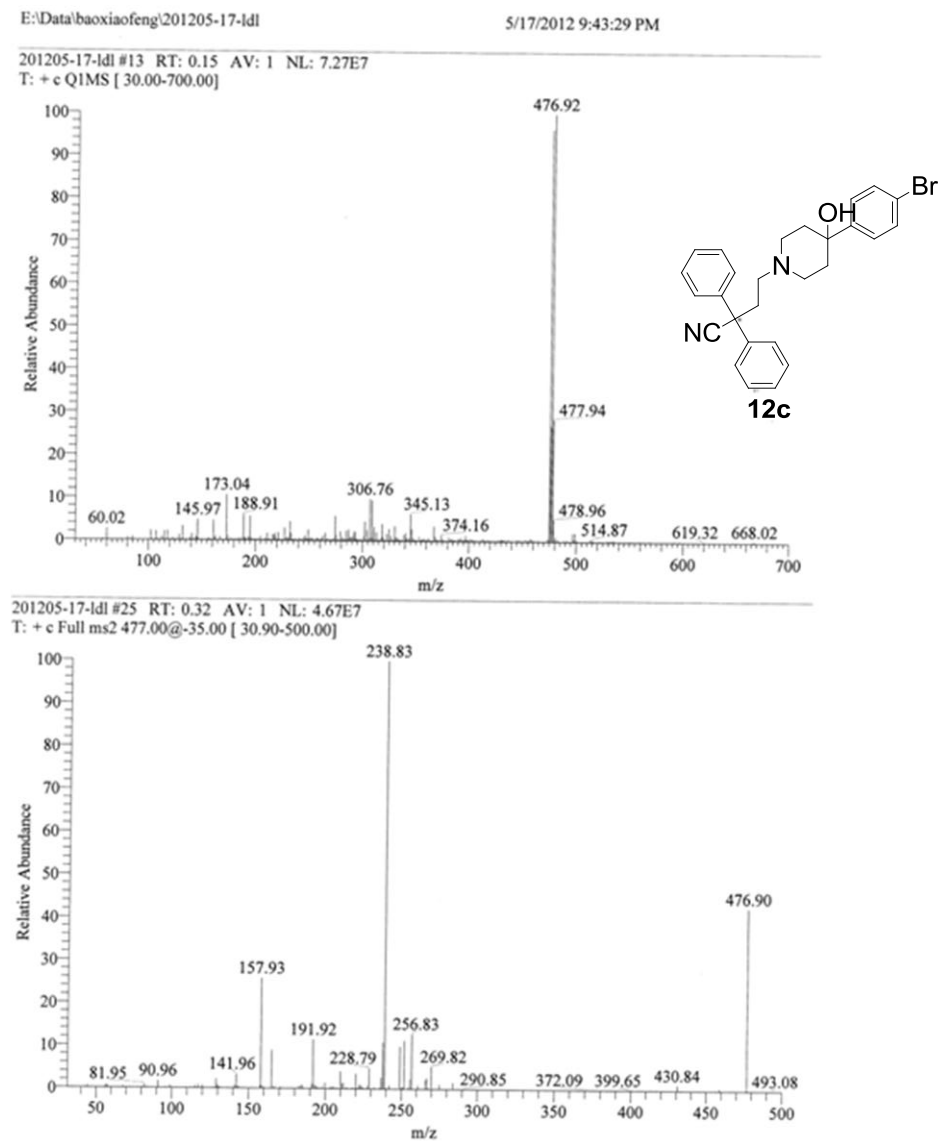

**Figure S11.** 500MHz  $^1\text{H}$ -NMR spectrum of Compound 6.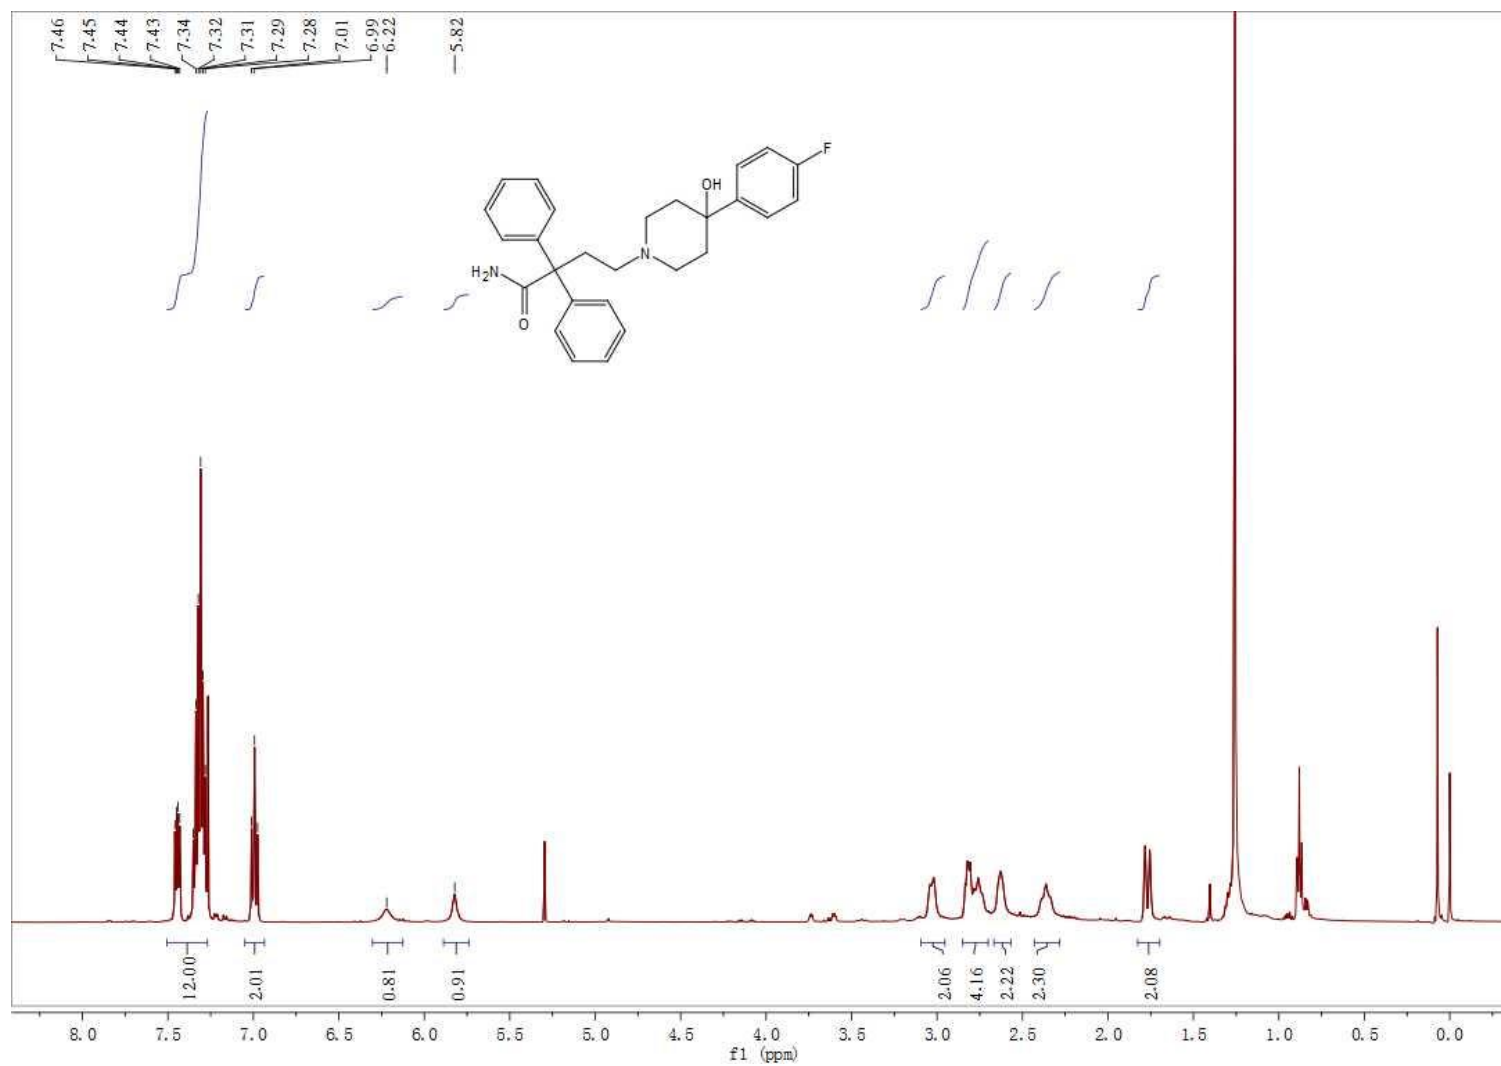

**Figure S12.** 125 MHz  $^{13}\text{C}$ -NMR spectrum of Compound 6.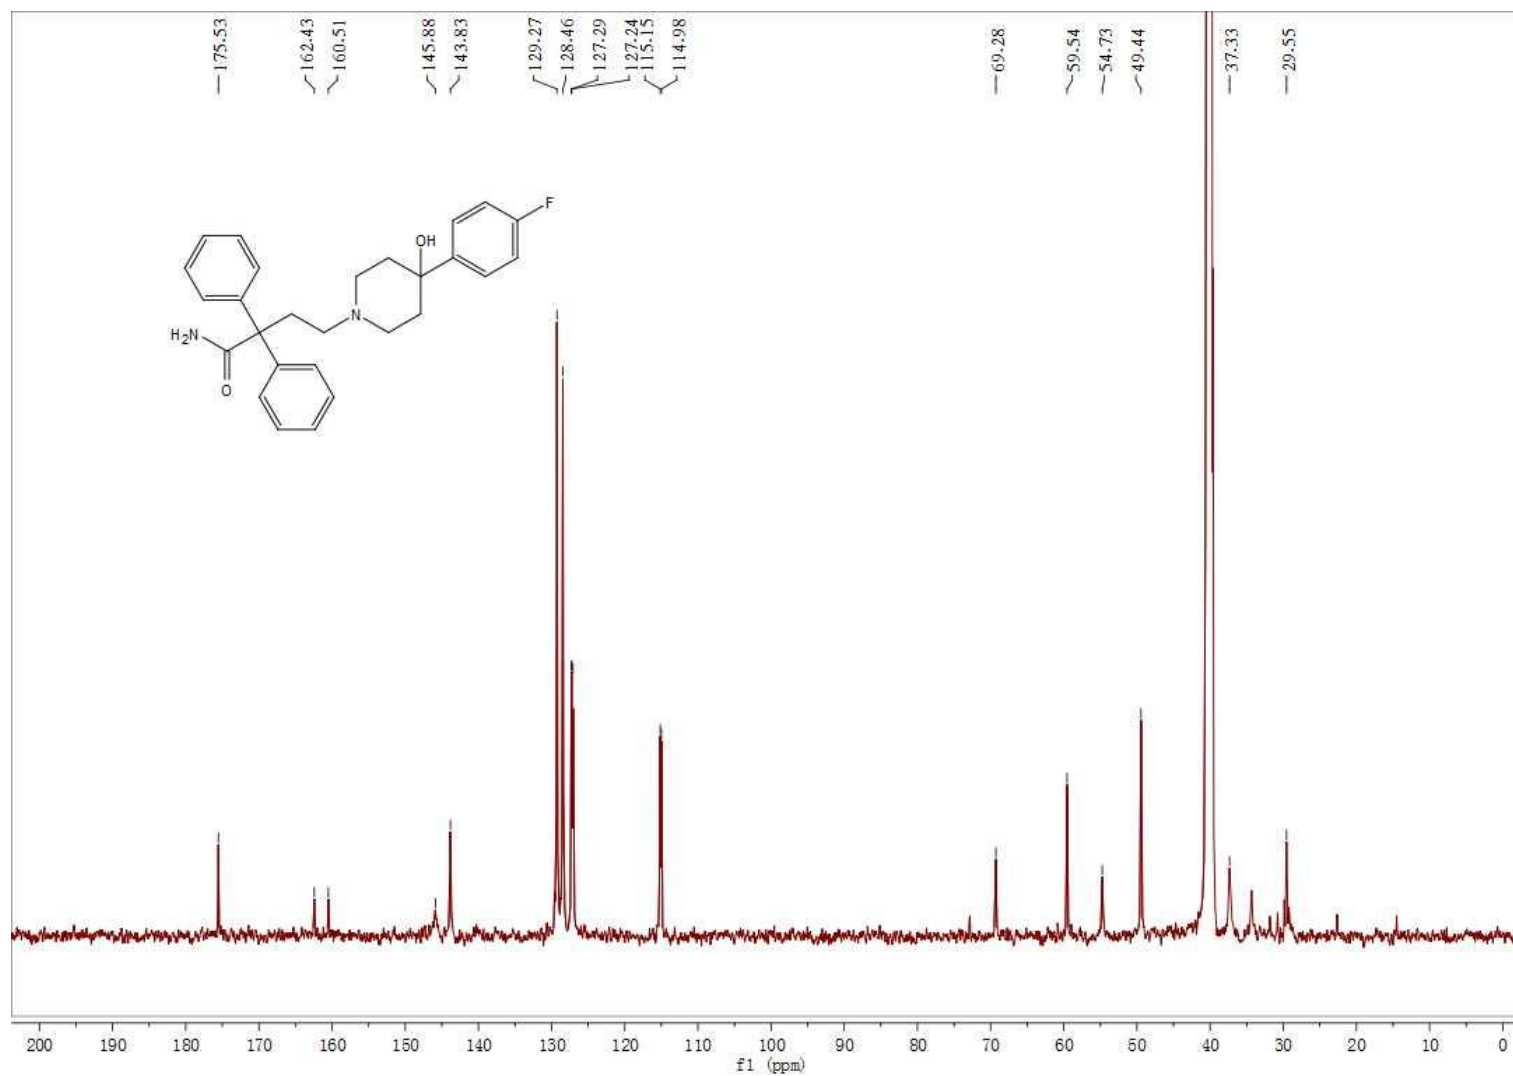

**Figure S13.** 470 MHz  $^{19}\text{F}$ -NMR spectrum of Compound 6.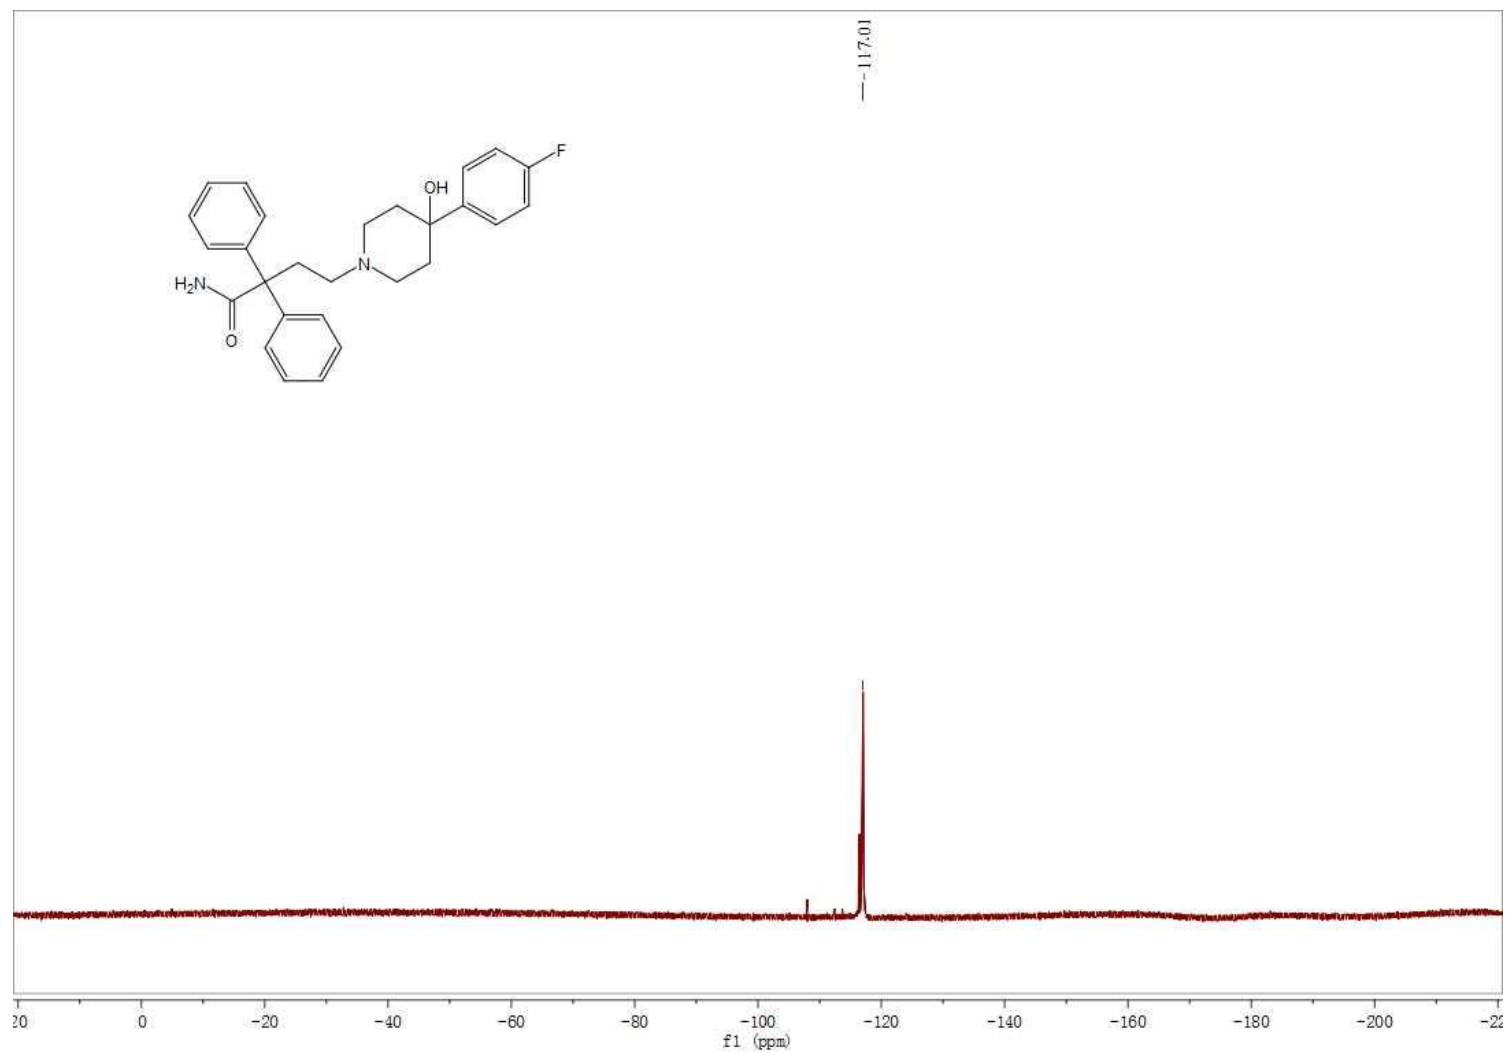

**Figure S14.** 500MHz  $^1\text{H}$ -NMR spectrum of Compound **13b**.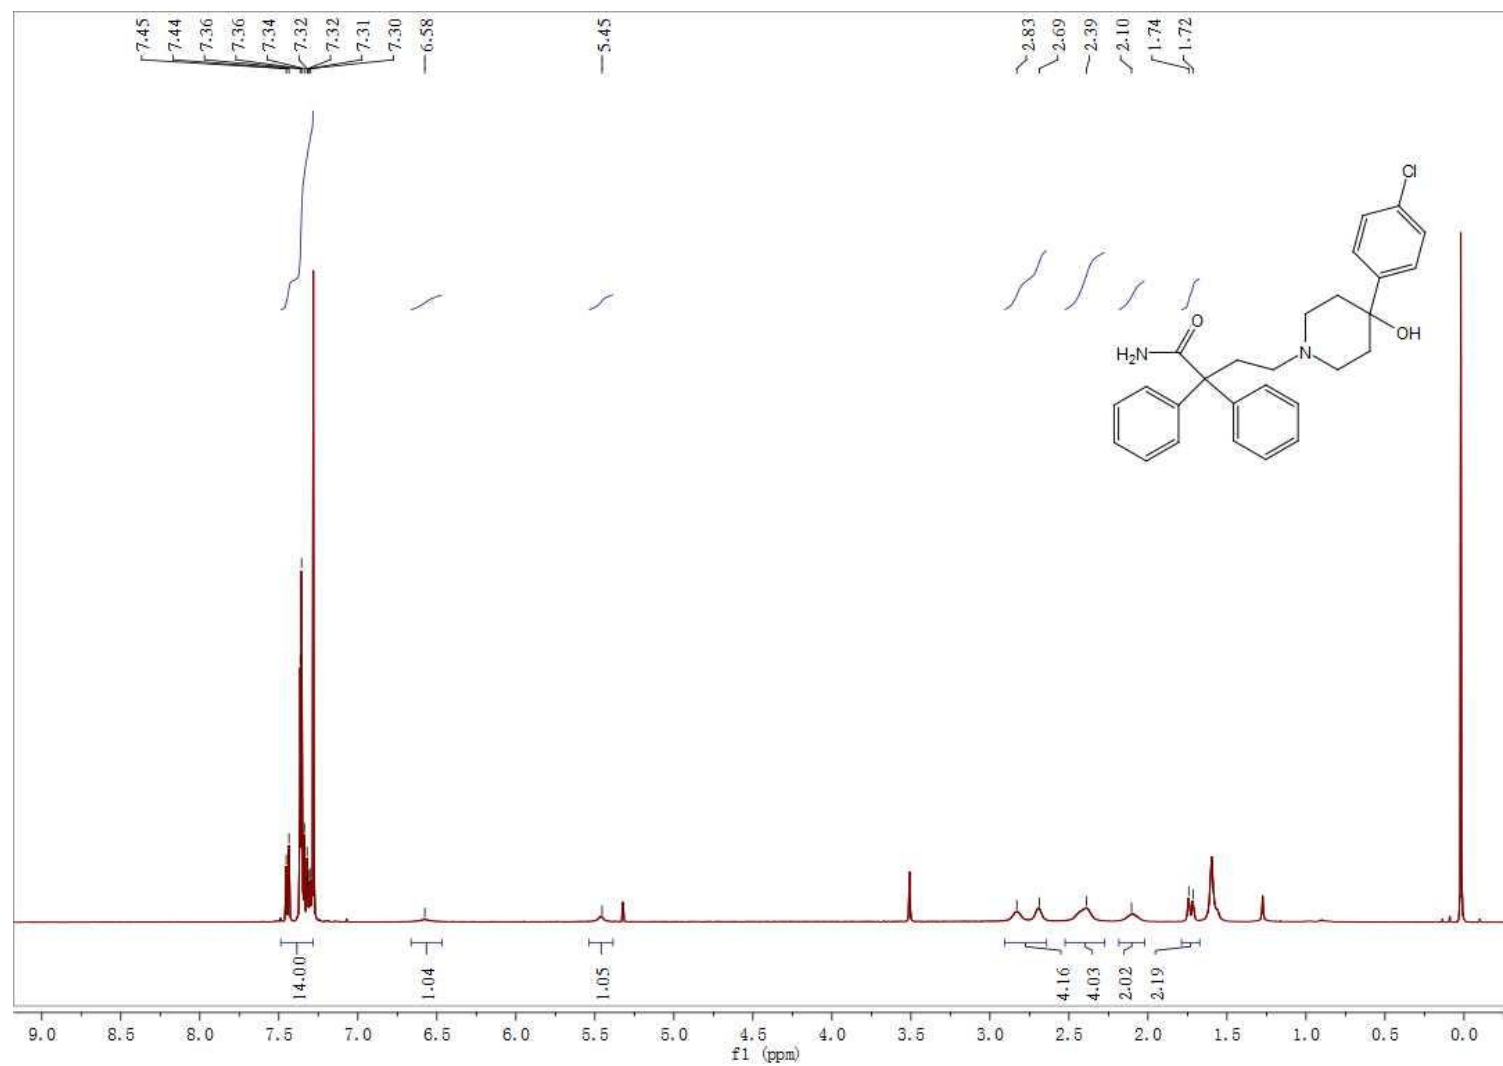

**Figure S15.** 100 MHz  $^{13}\text{C}$ -NMR spectrum of Compound 13b.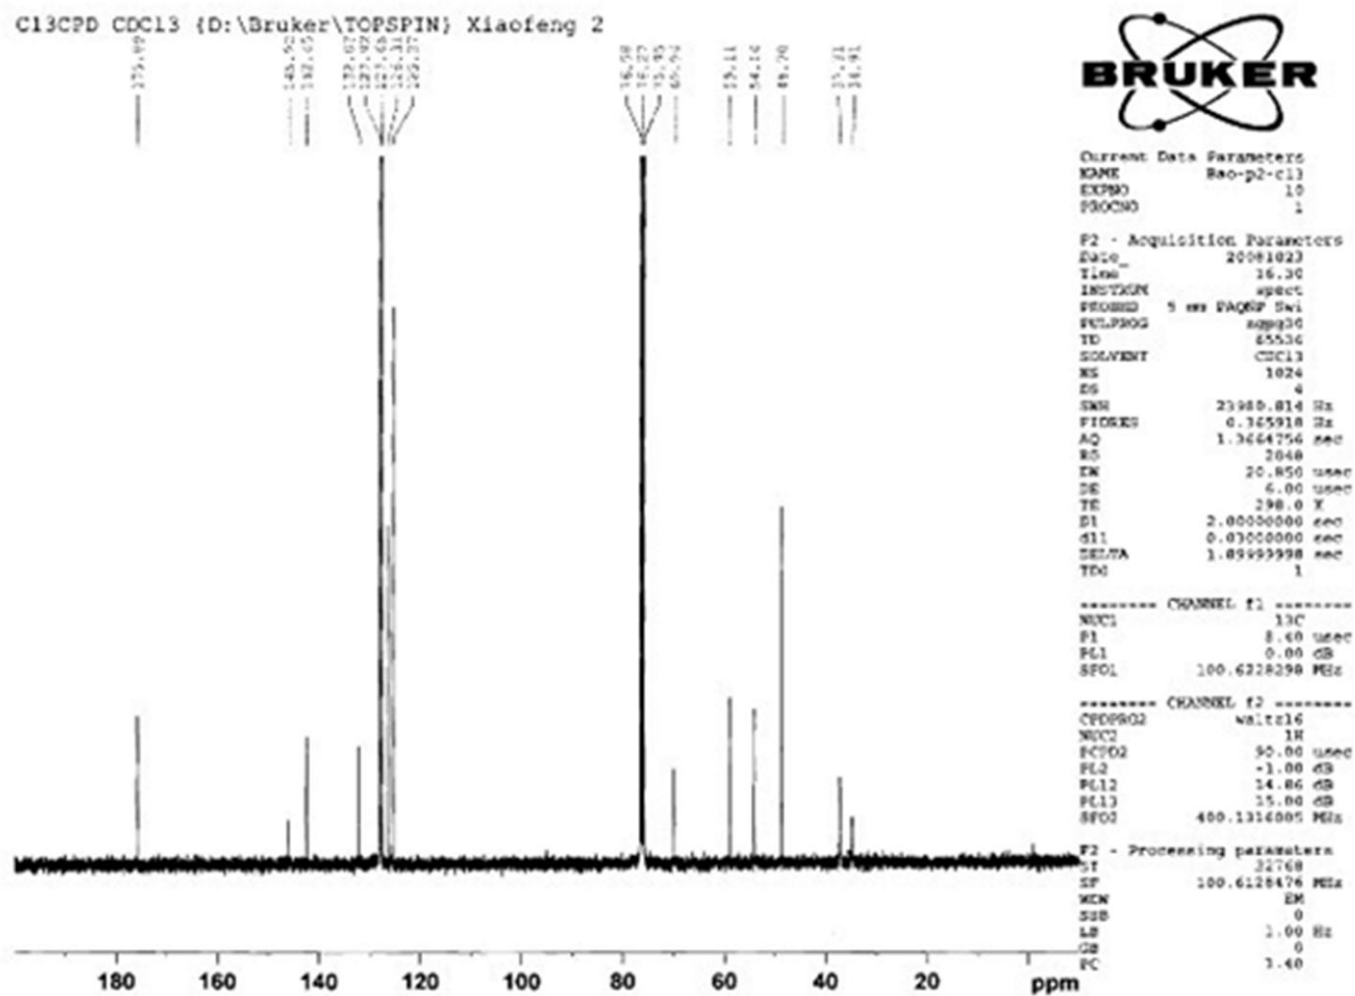

**Figure S16.** LC-MS spectrum of Compound 13b.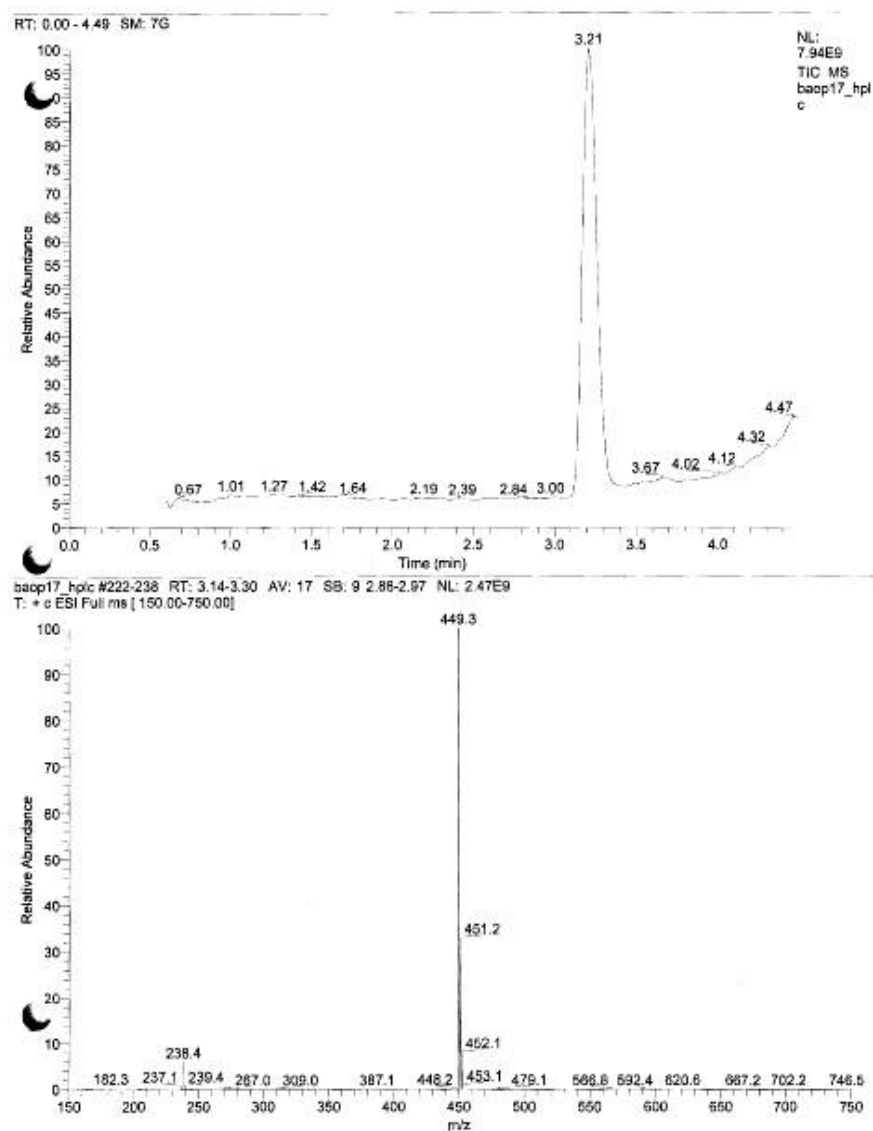

**Figure S17.** 500 MHz  $^1\text{H}$ -NMR spectrum of Compound 7.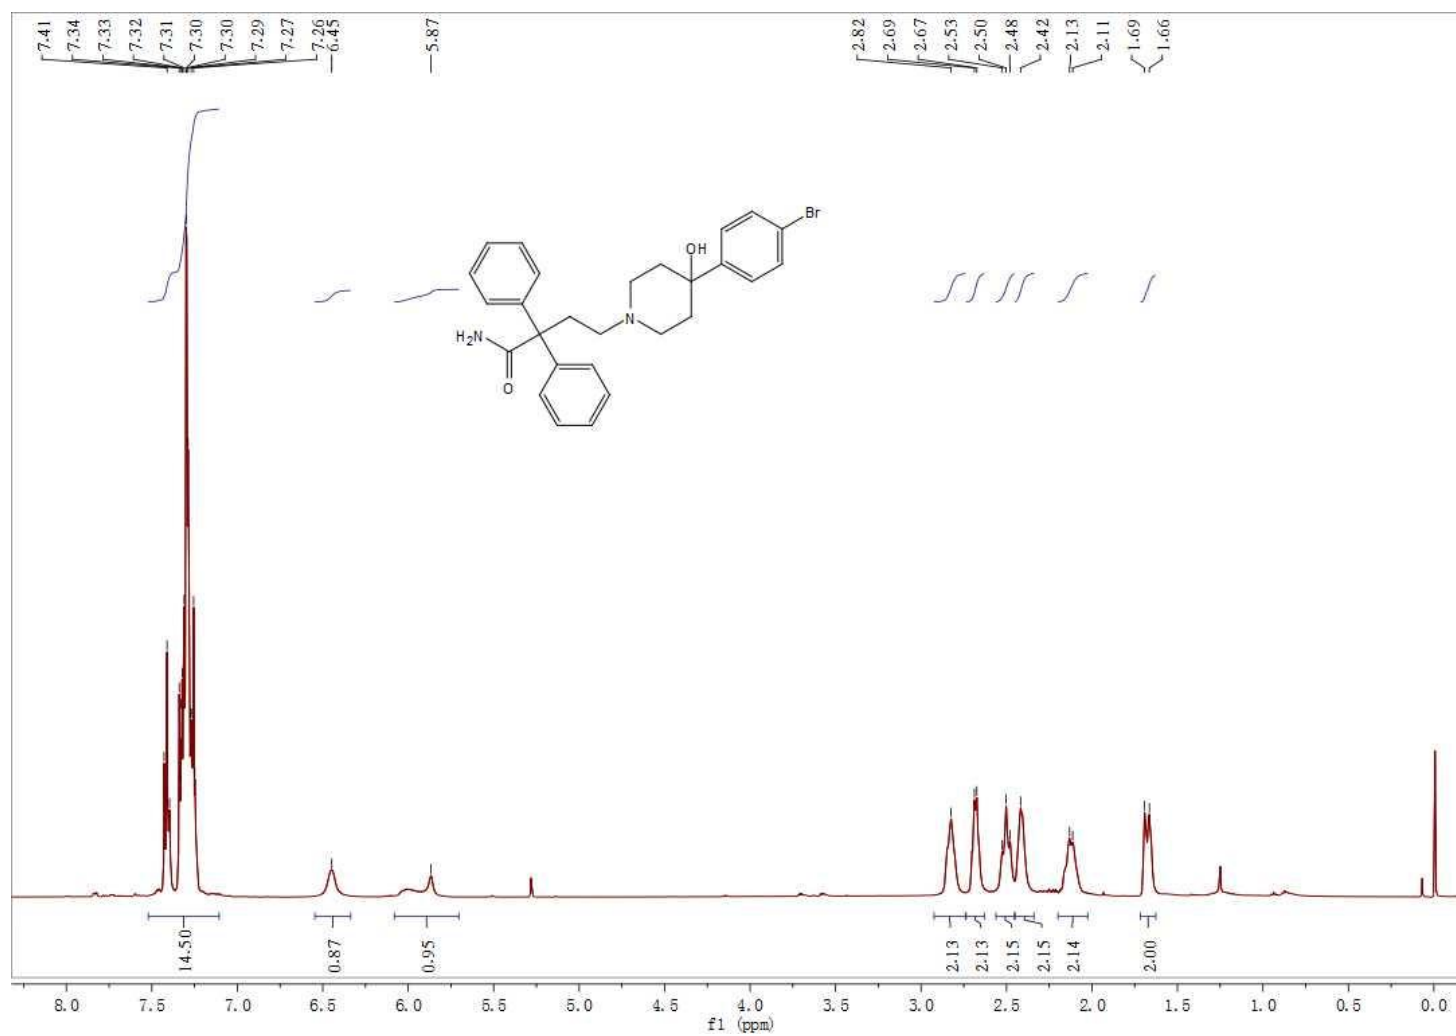

**Figure S18.** 125 MHz  $^{13}\text{C}$ -NMR spectrum of Compound 7.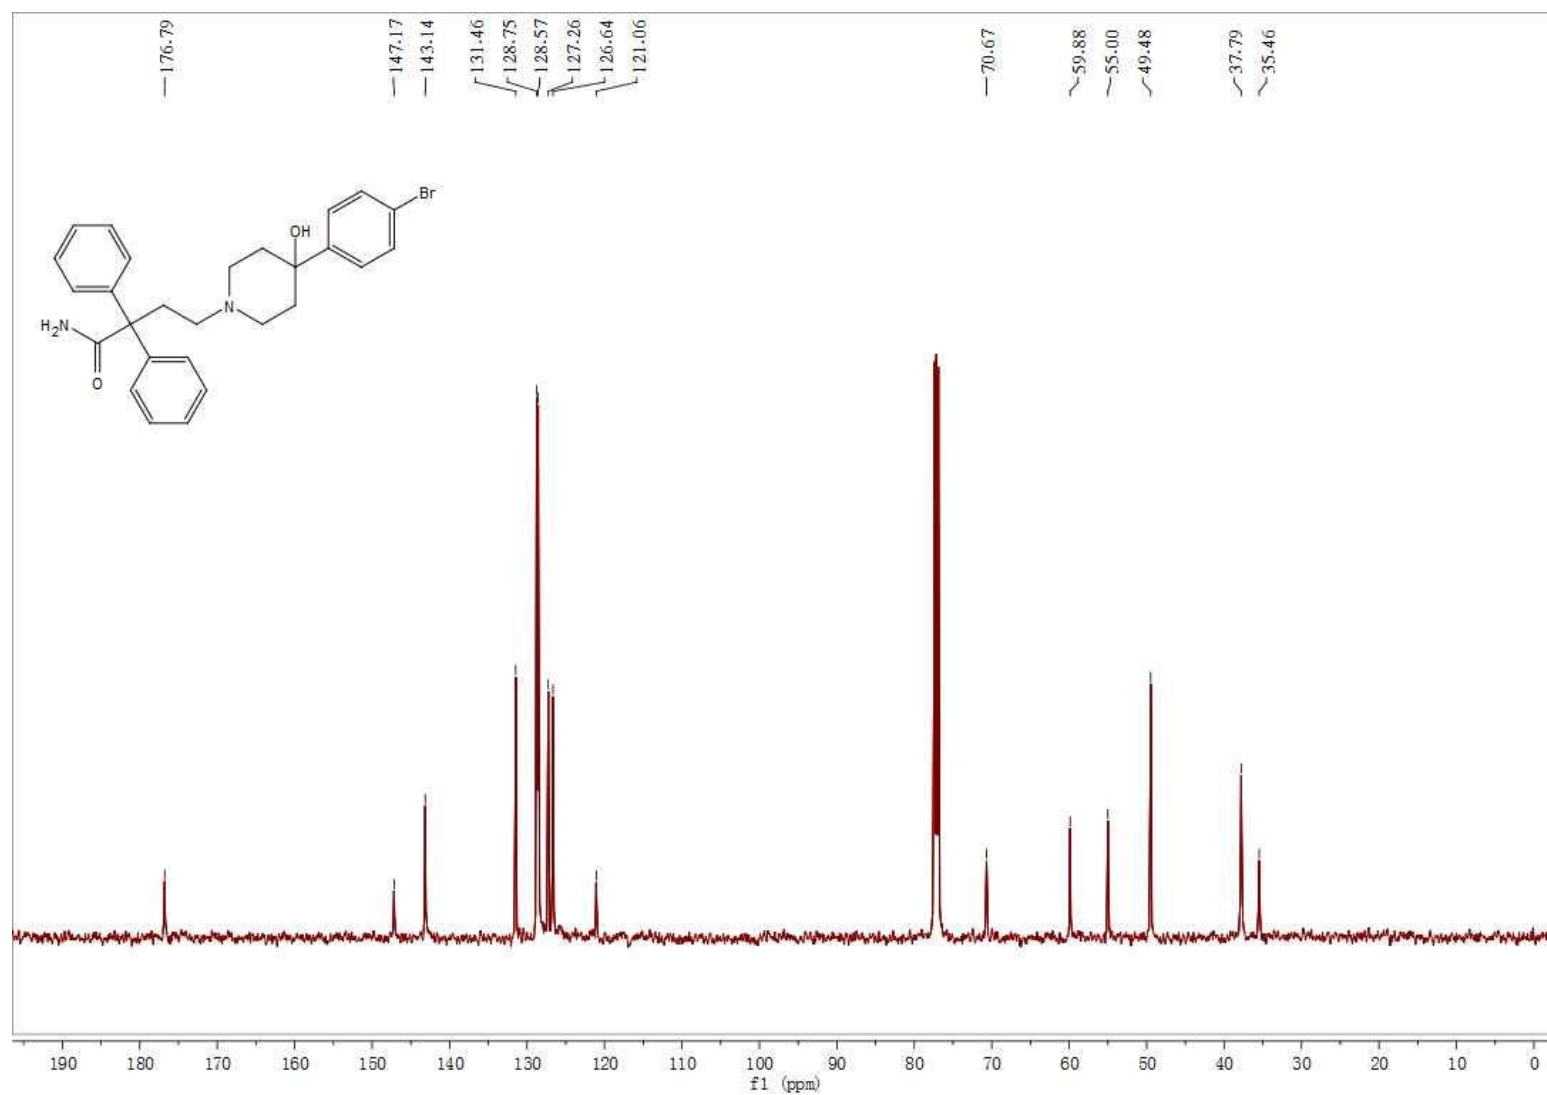

**Figure S19.** MS spectrum of Compound 7.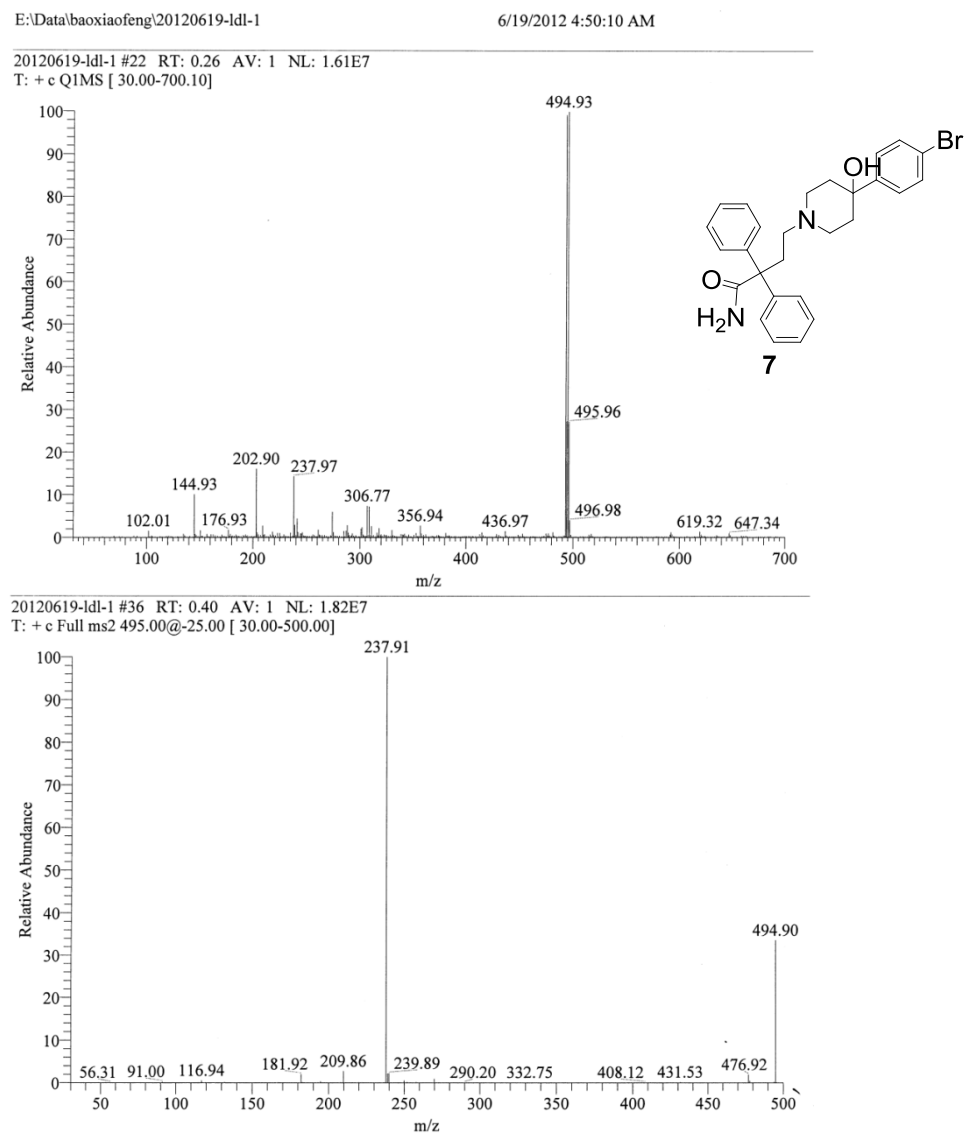

**Figure S20.** 500 MHz  $^1\text{H}$ -NMR spectrum of Compound **14b**.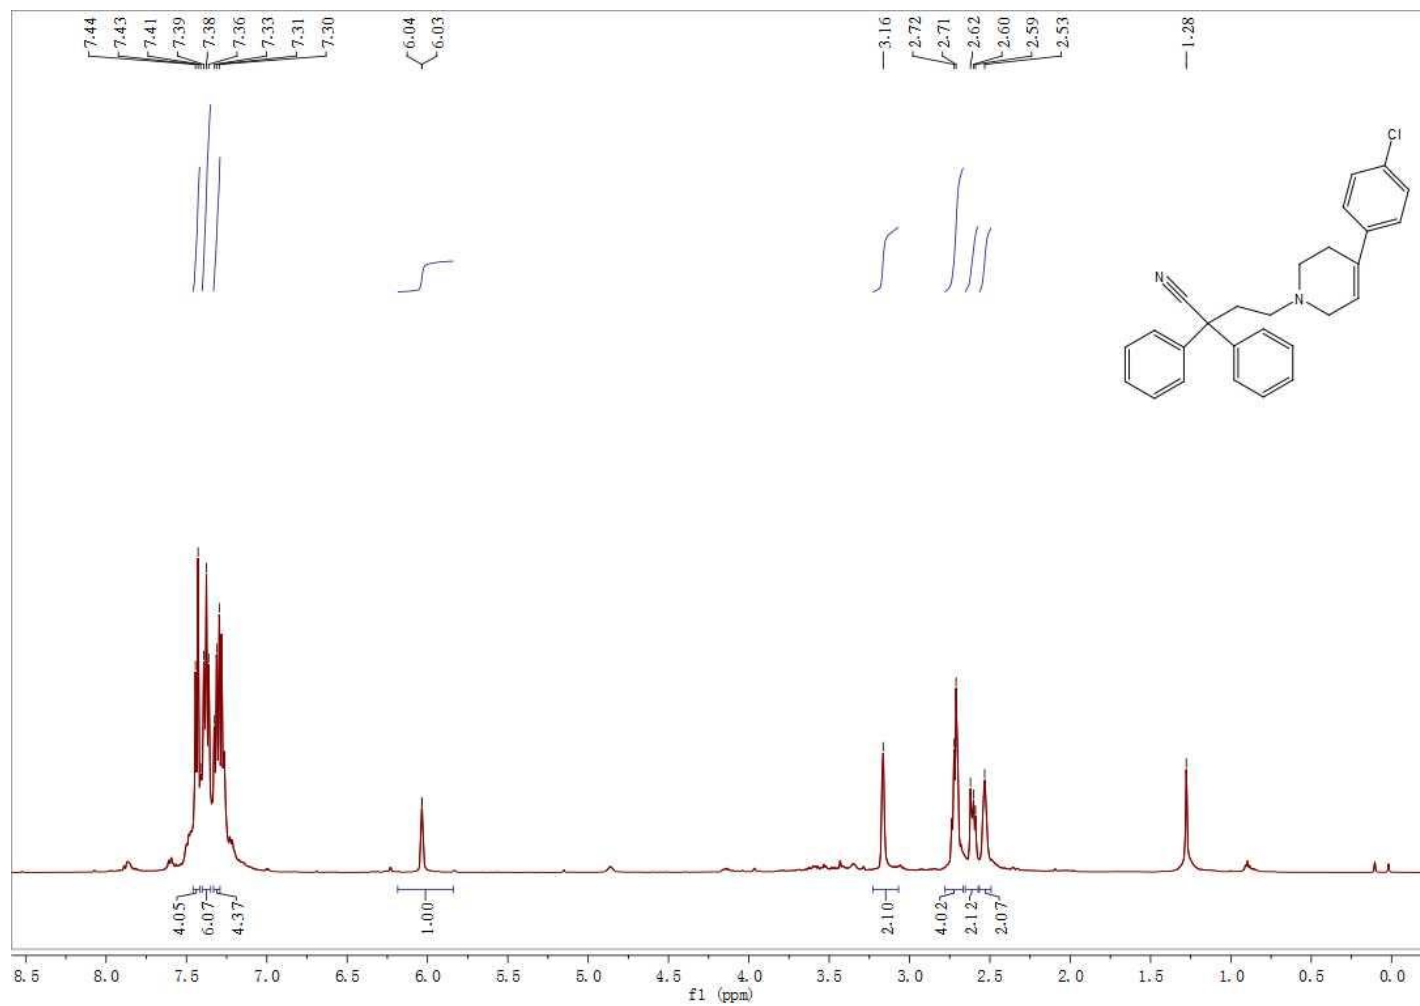

**Figure S21.** 125 MHz  $^{13}\text{C}$ -NMR spectrum of Compound **14b**.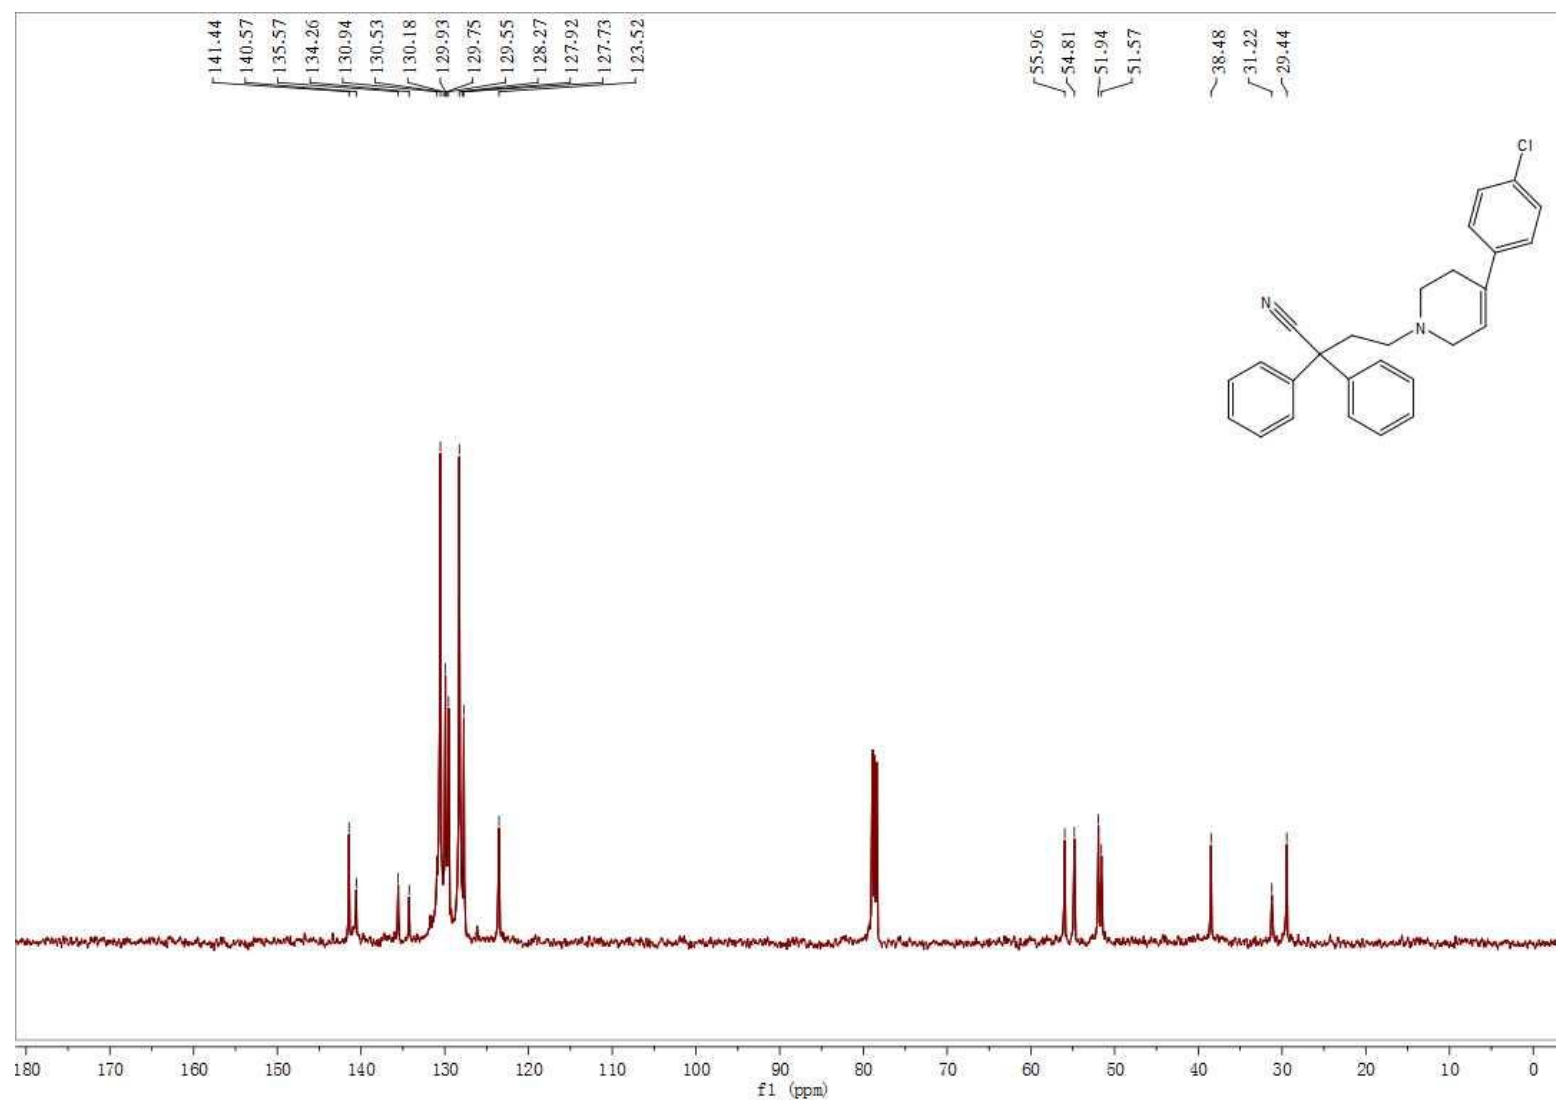

**Figure S22.** MS spectrum of Compound **14b**.

20120509-ldl-1 #39 RT: 0.50 AV: 1 NL: 2.05E8

T: + c Full ms2 413.00@-18.00 [ 30.90-500.00]

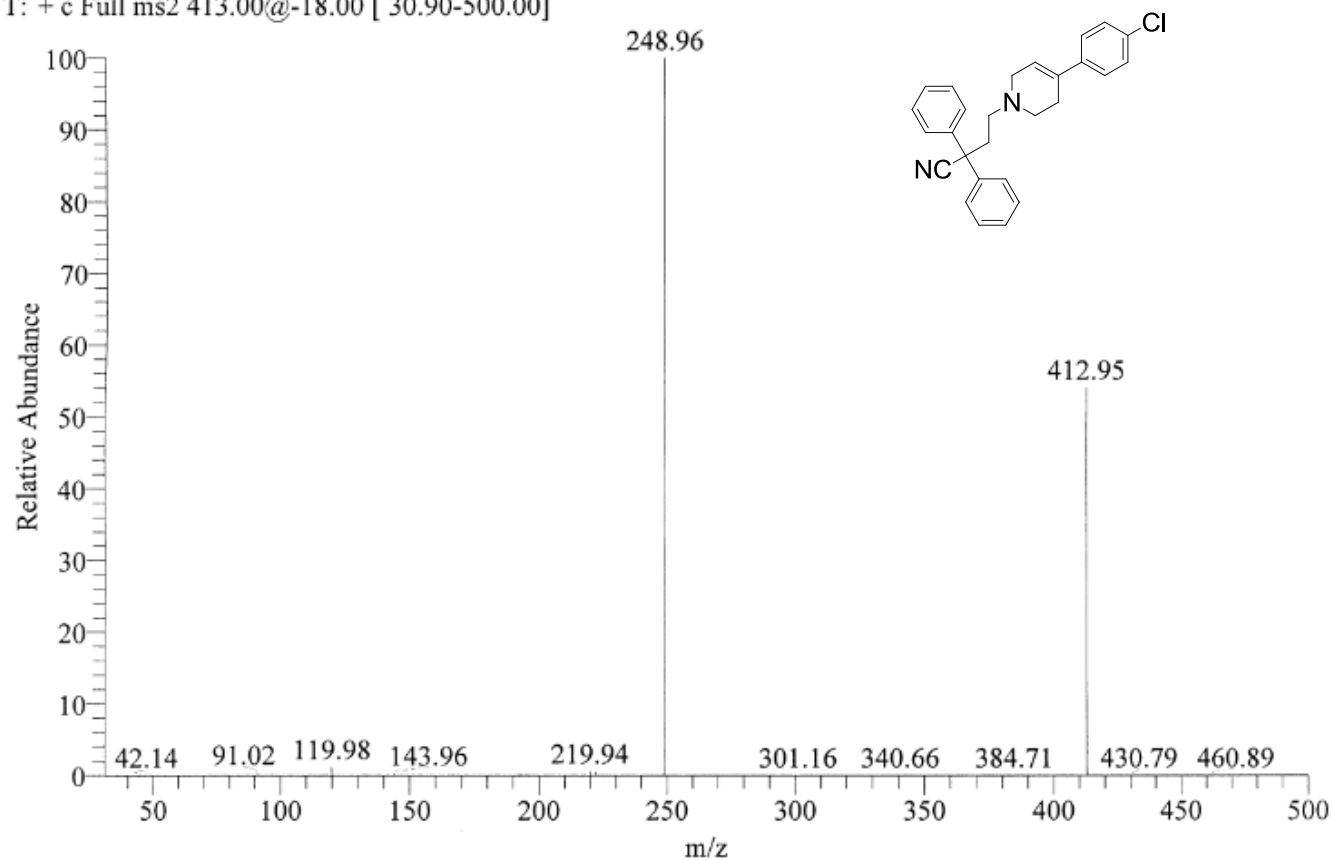

**Figure S23.** 500 MHz  $^1\text{H}$ -NMR spectrum of Compound 18.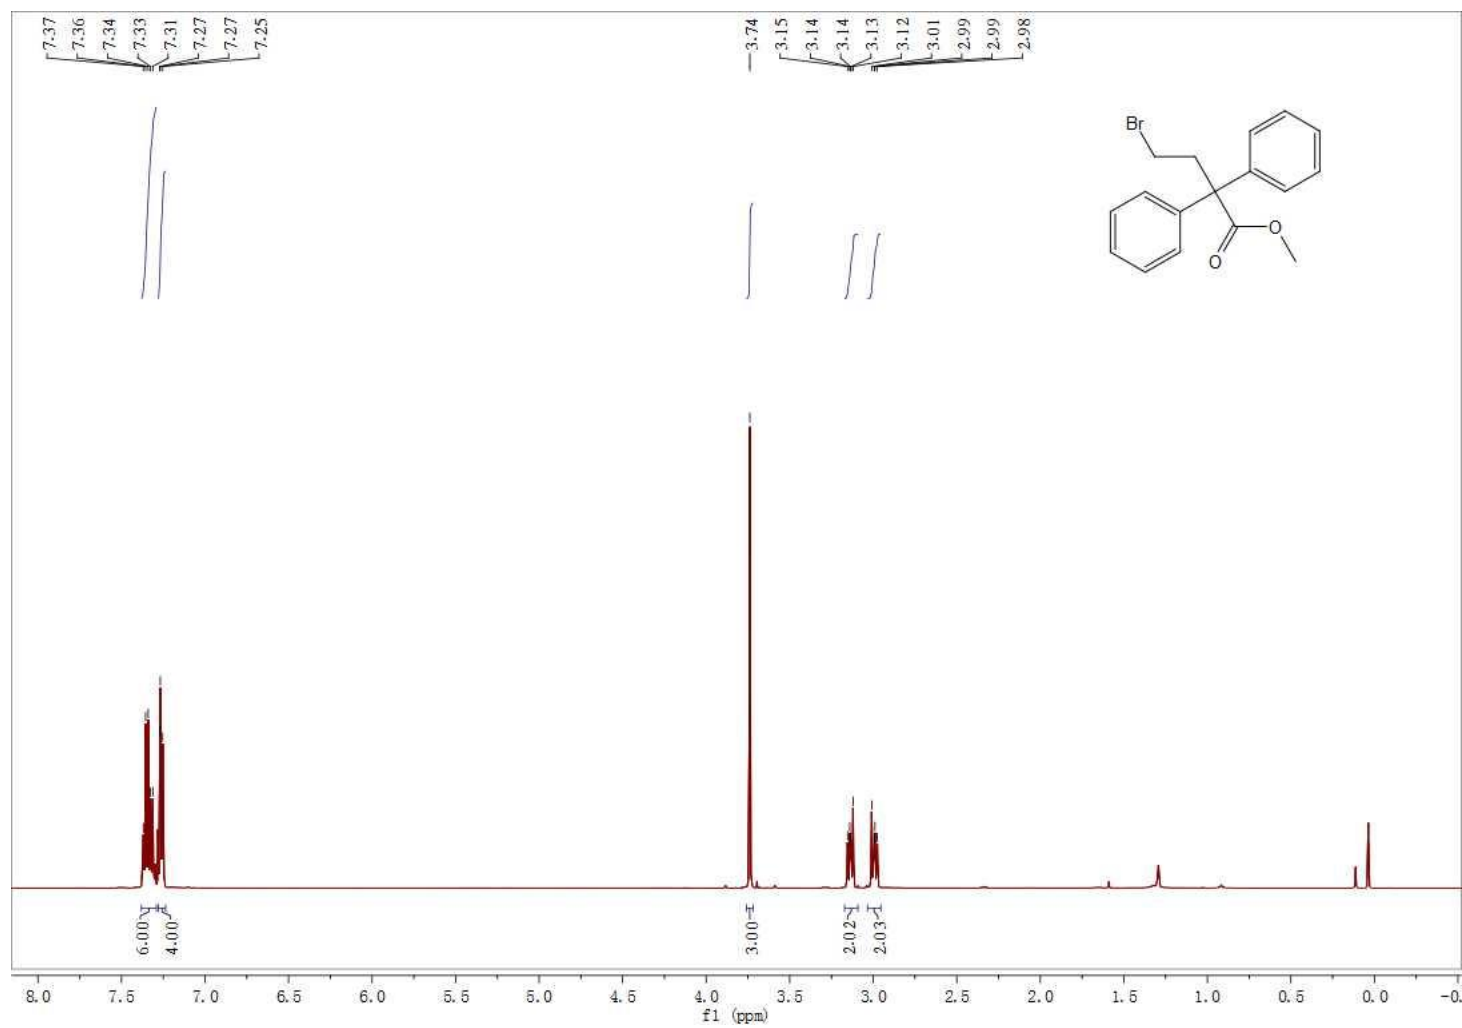

**Figure S24.** 125 MHz  $^{13}\text{C}$ -NMR spectrum of Compound **18**.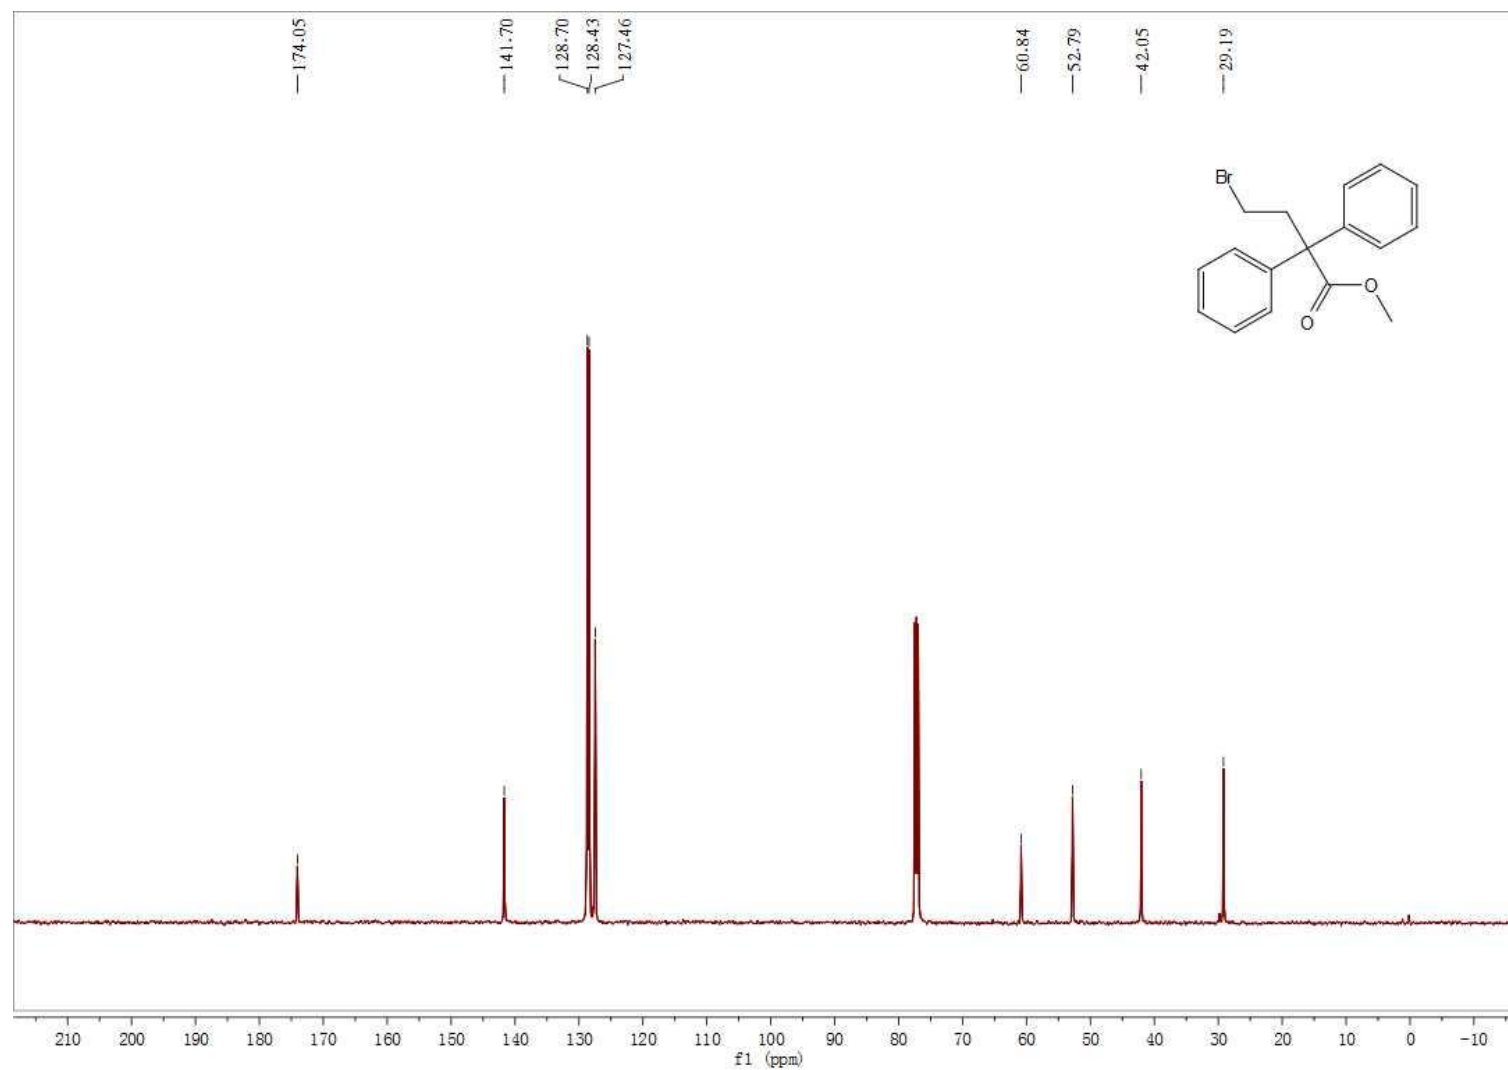

Figure S25. MS spectrum of Compound 18.

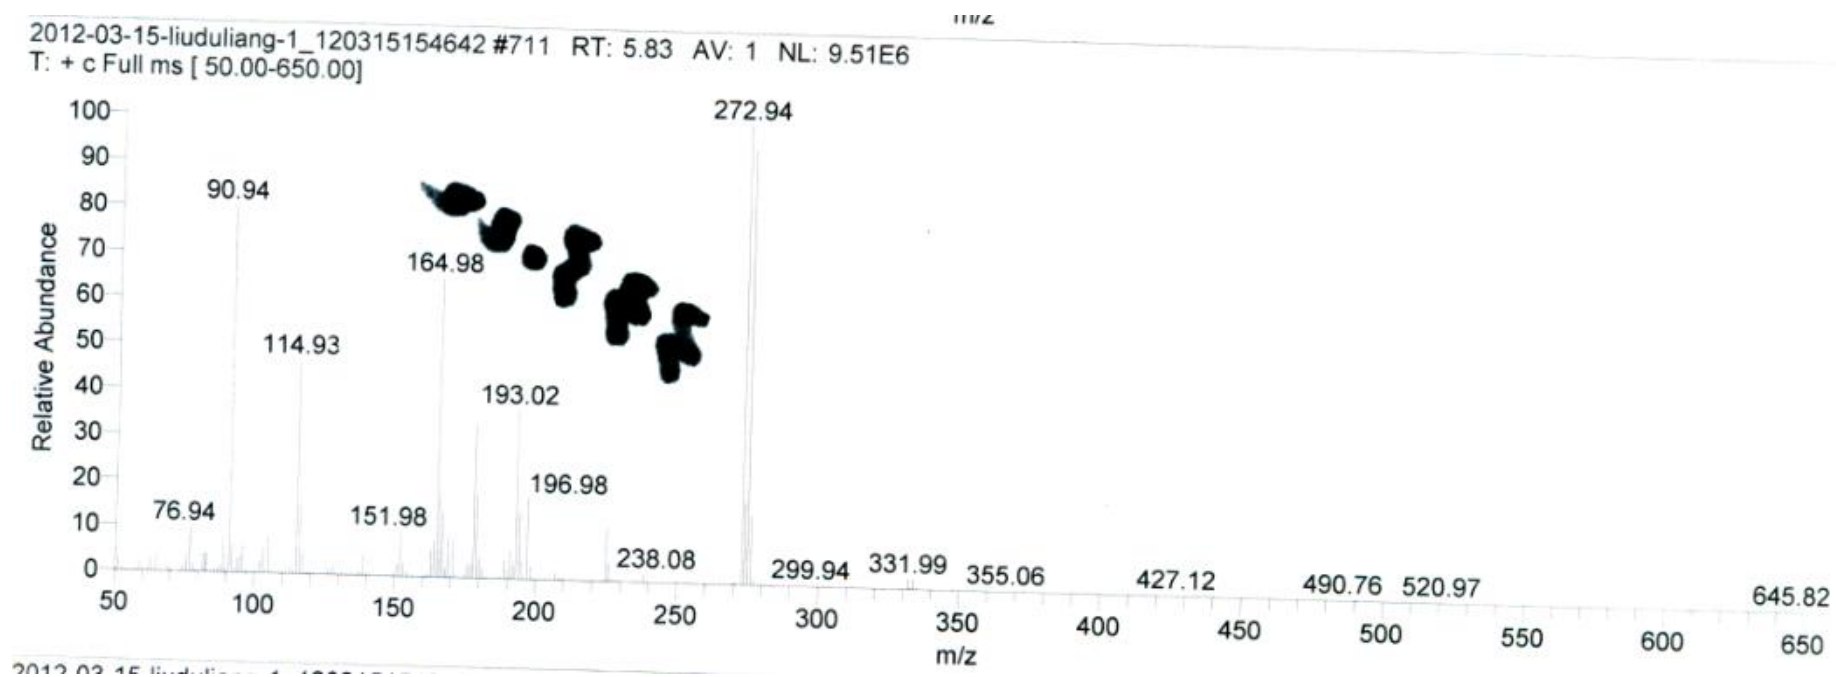

**Figure S26.** 500 MHz  $^1\text{H}$ -NMR spectrum of Compound 19.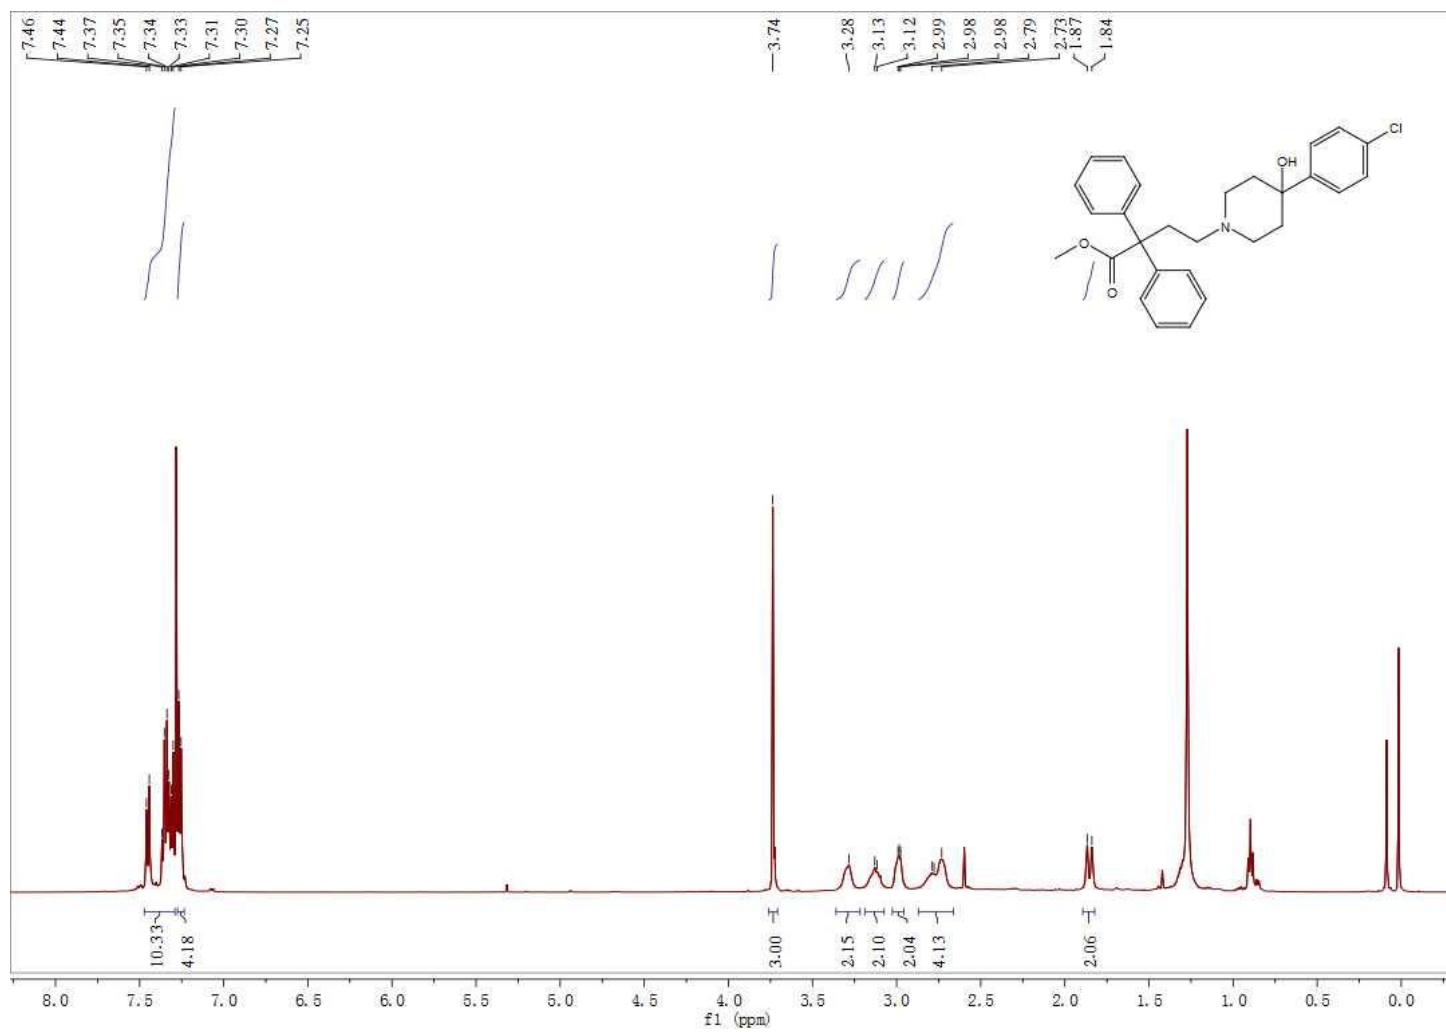

**Figure S27.** 125 MHz  $^{13}\text{C}$ -NMR spectrum of Compound **19**.

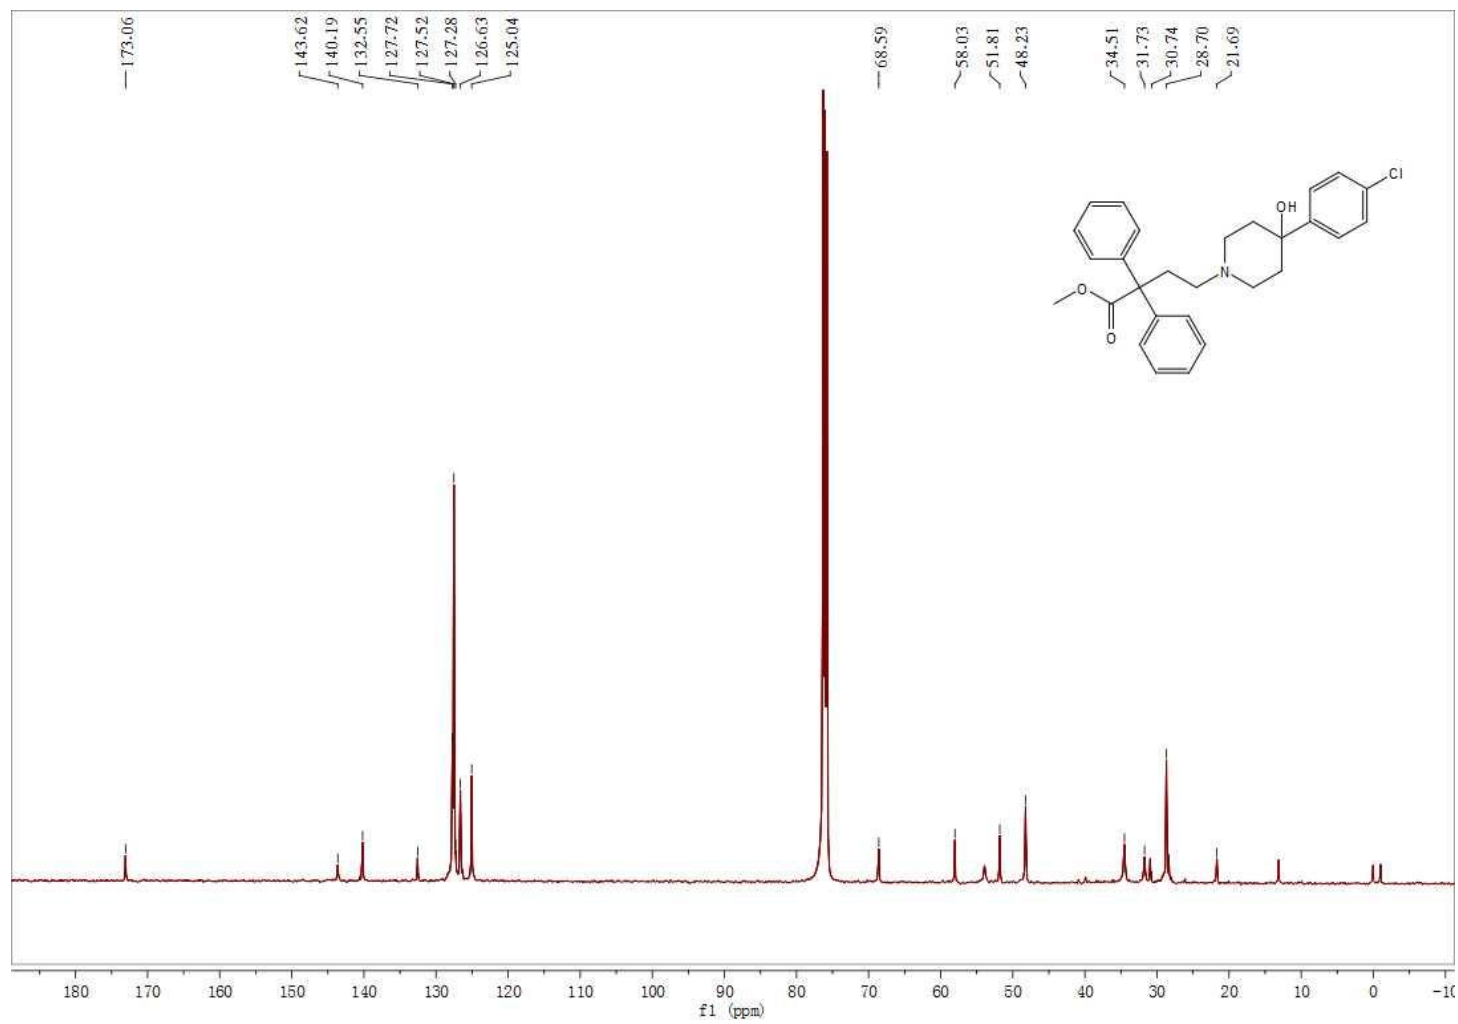

**Figure S28.** MS spectrum of Compound 19.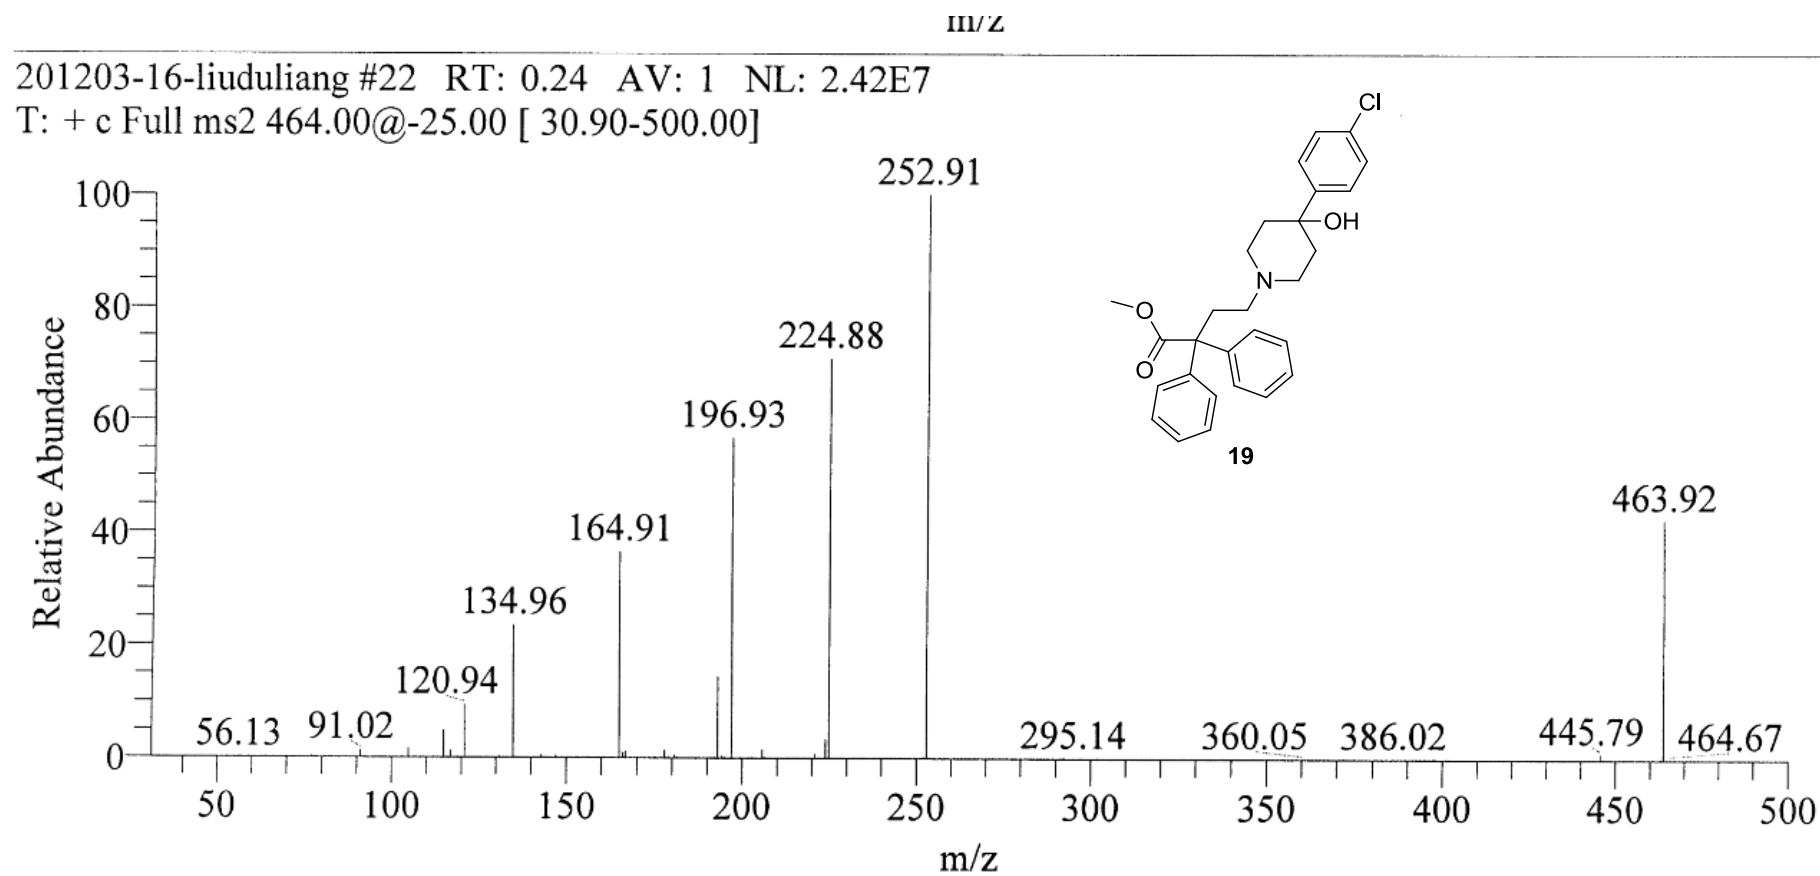

**Figure S29.** 500 MHz  $^1\text{H}$ -NMR spectrum of Compound 5.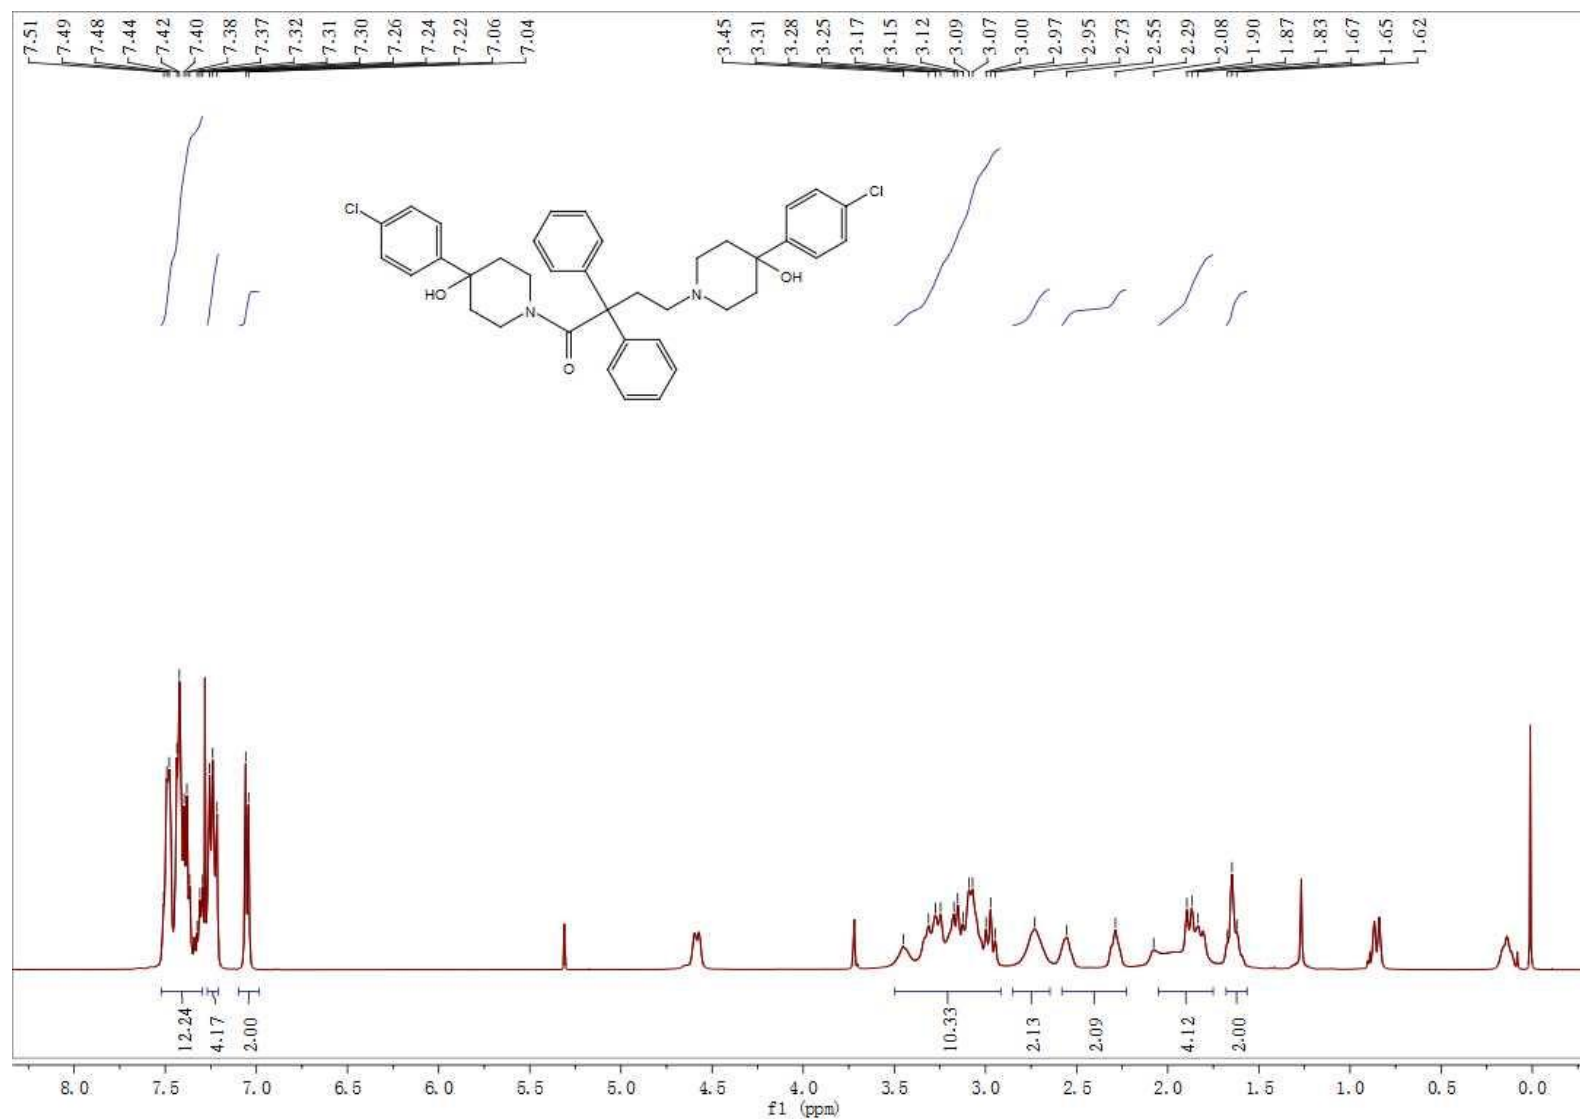

**Figure S30.** 125 MHz  $^{13}\text{C}$ -NMR spectrum of Compound 5.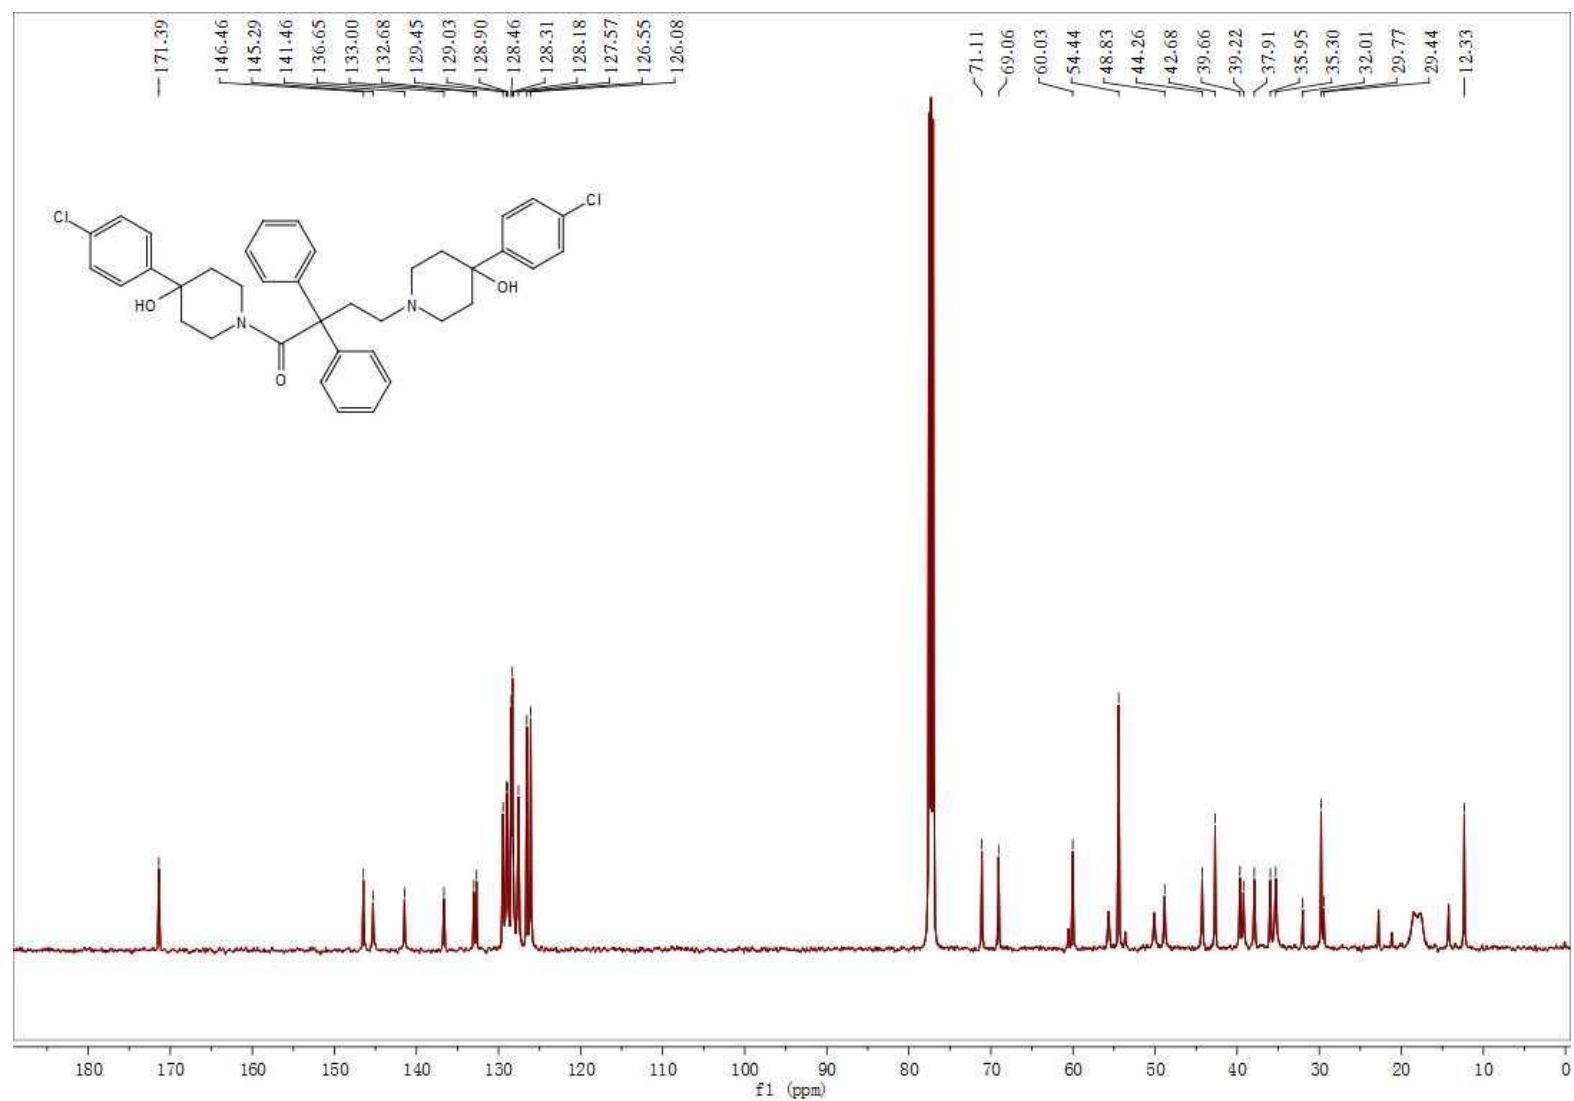

**Figure S31.** MS spectrum of Compound 5.

201203-16-liuduliang #45 RT: 0.51 AV: 1 NL: 1.77E8

T: + c Full ms2 645.00@-25.00 [ 30.90-700.00]

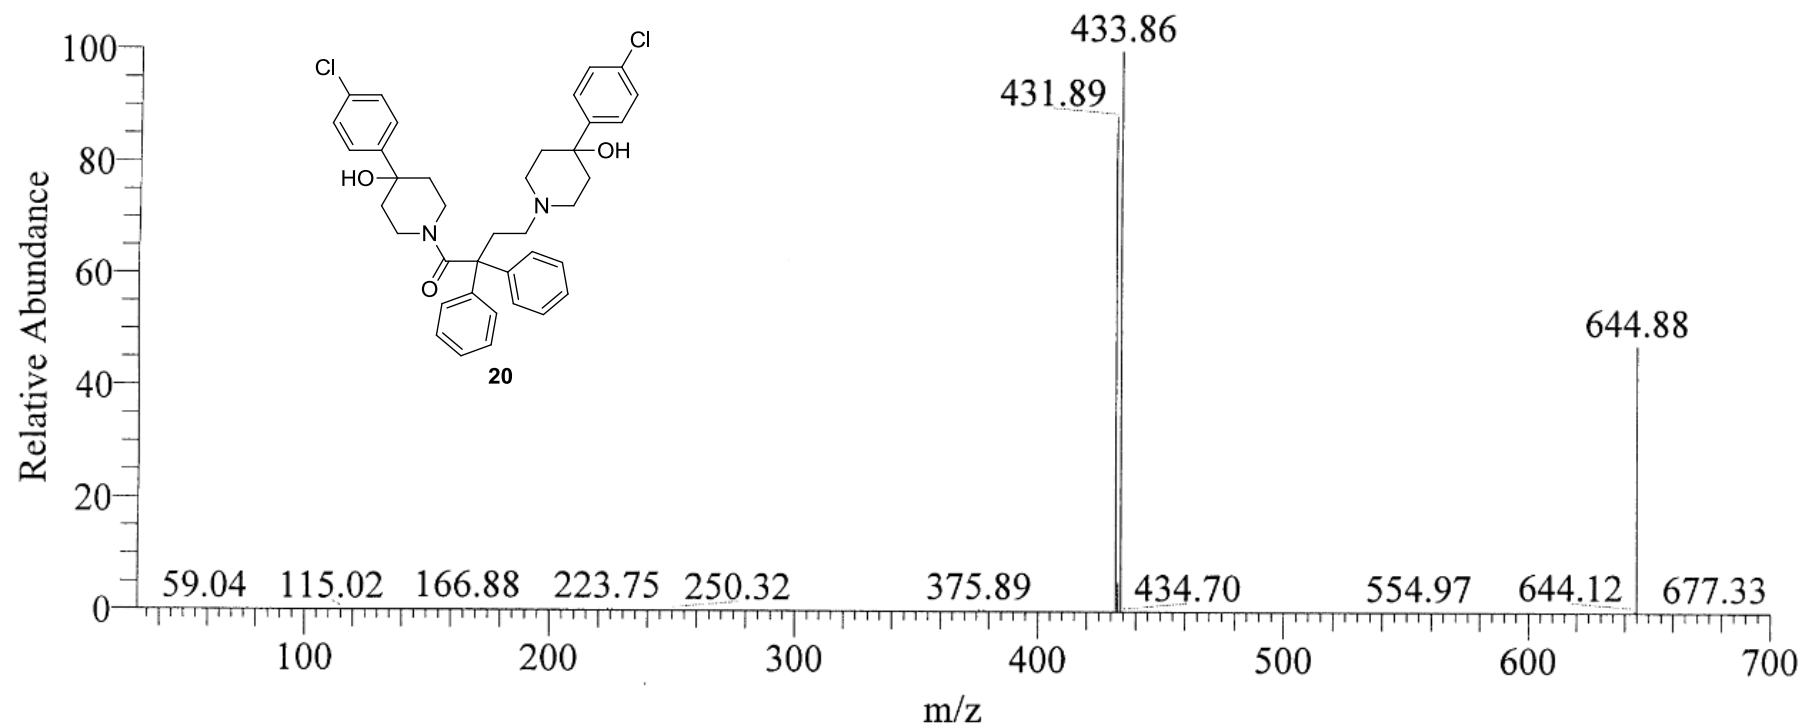

Supplement: Supplementary file 1 [file molecules-17-14288-s001.pdf]
